# Supplementary material for: Cannabis labelling is associated with genetic variation in terpene synthase genes
Source: Nat Plants. 2021 Oct 14;7(10):1330–4. doi: 10.1038/s41477-021-01003-y (PMC8516649; doi:10.1038/s41477-021-01003-y)
Supplement: Supplementary file 3 — Supplementary Table 1: Chemical concentrations and labels across 297 Cannabis samples. The asterisks denote chemicals with tentative identifications. Supplementary Table 2: Significant SNPs from the MLMM GWAS for myrcene and three sesquiterpenes. Only SNPs identified as significantly (P < 6.69 × 10−7) associated with a trait according to the MLMM GWAS are shown. The genomic coordinates and annotations, P value, R2 value and nearby candidate genes are shown. Supplementary Table 3: A list of compound names identified by Hazekamp et al.16, a list of authentic standards used for compound identification and a list of compound names based on re-analysis of the methods used in Hazekamp et al.16. [file 41477_2021_1003_MOESM3_ESM.xlsx]

## Sheet: supp_table_1
Sample	Sample_Name	Source	Label	type	alpha-pinene	beta-pinene	myrcene	alpha-phellandrene	delta-3-carene	ocimene	gamma-terpinene	terpinolene*	linalool	limonene*	fenchol	sabinene hydrate*	camphor	borneol	terpineol	unidentified compound 1	delta-guaiene*	caryophyllene	alpha-humulene	gamma-cadinene*	eudesma*	unidentified compound 2	alpha-guaiene*	gamma-selinene*	gurjunen*	caryophyllene oxide	bergamotene*	farnesene	aromadendrene	gamma-elemene*	guaiol*	gamma-eudesmol*	beta-eudesmol	alpha-bisabolol	THC	CBG	CBC	THCV	CBD	CBGM*	chemical total	monoterpenes	sesquiterpenes	cannabinoids	alpha-pinene norm
1	Northern Lights	TRIMBOS Institute	i	5	0.633817	0.342751	0.63892	0	0	0	0	0.176385	0.176385	0.205845	0	0	0	0	0.225061	0	0	1.05696	0.402236	0.615769	0.767862	0.054791	0	0.117675	0.154733	0	0.169078	0.291659	0	0	0.630563	0.701815	0.345777	0.31355	136.196	2.27394	1.54893	0.665206	0.56275	0.162285	149.431	2.39916	5.62246	141.41	0.264182
2	Amnesia Haze	TRIMBOS Institute	s	1	0.261114	0	0.734632	0.114683	0.124444	0.578345	0	1.75704	0.14155	0.468542	0	0	0	0	0.290397	0	0	2.13913	0.765196	0.503601	0.65515	0.124634	0.293382	0.606306	0	0	0.273794	0.454677	0	0.112419	0	0	0	0	207.589	11.6383	3.05404	1.48	0.721742	0.227485	235.109	4.47074	5.92829	224.71	0.058405
3	Northern Lights	TRIMBOS Institute	i	5	0.908248	0.419378	1.36921	0	0	0.176307	0	0.223128	0.298525	0.276215	0	0	0	0	0.315766	0	0	0.951356	0.343086	0.330725	0.423863	0	0	0	0.110409	0	0.19526	0.320736	0	0.193893	0.461113	0.507682	0.229468	0.265351	196.216	10.8659	1.73198	1.11943	0.748188	0.095173	219.097	3.98678	4.33294	210.777	0.227815
4	Amnesia	TRIMBOS Institute	s	1	0.231267	0.436194	0.486406	0	0	0.625161	0	1.07335	0.13239	0.370945	0	0	0	0	0.190235	0	0	2.87816	1.0272	0.477152	0.602361	0.127912	0.419665	0.641686	0.161715	0	0.231332	0.40259	0	0.118369	0	0	0	0	122.43	8.39834	1.90425	0.713569	0.448455	0.132033	144.66	3.54595	7.08814	134.026	0.0652201
5	Lemon Haze	TRIMBOS Institute	s	1	0.639579	0.369698	0.692915	0	0	0.123132	0	0	0.0636066	0.253482	0	0	0	0	0.183626	0	0	1.37011	0.399342	0.367724	0.468958	0.0525823	0.104048	0.0906784	0	0	0.256566	0.331569	0	0.140628	0.261164	0.309573	0.145347	0.251665	145.444	5.23849	2.05334	0.802144	0.447877	0	160.862	2.32604	4.54996	153.986	0.274965
6	Amnesia	TRIMBOS Institute	s	1	0.267068	0.26185	0.449087	0.051189	0	0.447906	0	1.16071	0.138828	0.331435	0	0	0	0	0.282608	0	0	2.13764	0.798586	0.595868	0.823921	0.181084	0	0.80389	0	0	0	0	0	0	0	0.153803	0	0.140258	140.436	13.9751	3.4638	0.9562	0.436496	0	168.293	3.39068	5.63505	159.267	0.0787653
7	Lemon Haze	TRIMBOS Institute	s	1	0.456931	0.85529	0.586522	0.131948	0.171048	0.466769	0	1.96214	0.144175	0.518049	0	0	0	0	0.337209	0	0	2.04911	0.710006	0.462736	0.658507	0.142023	0	0.731887	0	0	0	0	0	0.132247	0	0	0	0.048803	193.946	14.3176	2.38018	1.42659	0.67837	0.136261	223.45	5.63008	4.93532	212.885	0.0811588
8	Northern Lights	TRIMBOS Institute	i	5	0.424748	0.806995	1.13888	0.181217	0.188498	1.41881	0	3.05	0.286032	0.741461	0	0	0	0	0.334733	0	0	4.43312	1.61591	0.752825	1.05647	0.140998	0	1.32316	0	0	0	0.656677	0	0.339507	0	0.172925	0	0.105478	202.773	18.8543	2.66721	1.28867	0.59617	0.14466	245.492	8.57138	10.5971	226.324	0.0495542
9	Champagne Haze	TRIMBOS Institute	s	1	0.346712	0.658735	0.926879	0.16411	0.168733	0.993973	0	2.57297	0.184897	0.651829	0	0	0	0	0.348996	0	0	4.47363	1.63707	1.01651	1.23658	0.266267	0	1.08387	0	0	0	0.518707	0	0.148188	0	0.222298	0	0.104197	204.928	15.8352	2.95565	1.3807	0.767744	0.212996	243.805	7.01783	10.7073	226.08	0.0494044
10	OG Kush	TRIMBOS Institute	hs	2	0.2497	0.358076	0.520623	0	0.0989522	0.299231	0	0.848559	0.136612	0.376888	0	0	0	0	0.31333	0	0	1.97298	0.696168	0.474455	0.599672	0.323075	0	0	0	0	0	0	0	0	0	0	0	0.108569	214.164	16.0568	3.07905	1.54077	0.742431	0.157939	243.118	3.20197	4.17492	235.741	0.0779833
11	Santa Maria	TRIMBOS Institute	hs	2	1.98969	0.607828	1.89952	0	0	0	0	0	0.178092	0.327669	0	0	0	0.467762	0.479559	0	0	1.02757	0.387704	0.325894	0.425798	0	0	0.126046	0	0	0.242578	0.368584	0	0.252118	0.342549	0.40913	0.22599	0.233092	98.8861	3.6123	1.33975	0.494423	0.356568	0	115.006	5.95012	4.36705	104.689	0.334394
12	LA Confidential	TRIMBOS Institute	i	5	0.399688	0.608995	0.498395	0	0	0.293711	0	0.129173	0.540715	2.27062	0.409131	0.286874	0	0	0.517243	0	0	2.20475	0.635968	0.788491	1.23525	0.0569997	0.233194	0.55308	0.110797	0	0.282793	0.296649	0	0.270839	0	0.155528	0	0.666646	207.463	10.3766	2.00101	0.422771	0.93097	0	234.64	5.95454	7.49098	221.195	0.0671232
13	S5 Haze	TRIMBOS Institute	s	1	0.407135	0.840131	0.411752	0	0.152982	0.200051	0	0.562588	0.134155	0.428307	0	0	0	0	0.268346	0.1674	0	2.44255	0.877073	0.32304	0.351332	0.15087	0.146734	0.33014	0	0	0.259285	0.315868	0.138566	0.122597	0	0	0	0	185.633	12.2516	2.42876	1.3711	0.554285	0	211.27	3.40545	5.62546	202.239	0.119554
14	Skunk	TRIMBOS Institute	i	5	0.448054	0.23122	1.34176	0	0	0.0496465	0	0	0.276583	0.212146	0	0	0	0	0.250295	0.152748	0	0.637489	0.260295	0.408023	0.410756	0	0	0.0544716	0	0	0.126534	0.207665	0	0	0.58988	0.620992	0.329463	0	136.167	6.6105	1.42932	0.485469	0.510001	0.119281	151.93	2.8097	3.79832	145.322	0.159467
15	Sheeva	TRIMBOS Institute	hs	2	1.12749	0.566148	3.63787	0	0	0.211761	0	0.142777	0.340167	0.451988	0	0	0	0	0.382952	0.0663597	0	2.40672	0.943631	0.764949	0.831813	0	0	0.26922	0.128584	0	0.302702	0.483829	0	0.676781	0.822157	0.941337	0.436077	0.302627	224.987	9.13706	1.89976	1.2586	0.847285	0.0646055	254.432	6.86115	9.37678	238.194	0.164329
16	Edelweiss	TRIMBOS Institute	hs	2	0.638109	0.250946	1.42915	0	0	0	0	0	0.313078	0.372828	0	0	0	0	0.126667	0	0	1.29525	0.553044	0.466848	0.572184	0.213078	0	0	0	0	0.153228	0.210702	0	0	0.493229	0.545884	0.28012	0.201109	141.552	2.56962	1.07987	0.823981	0.568401	0	154.709	3.13077	4.98468	146.594	0.203818
17	Superpowerplant	TRIMBOS Institute	hs	2	0.666876	0.297758	1.78692	0	0	0	0	0	0.21904	0.206719	0	0	0	0	0.157437	0	0	0.845579	0.310631	0.285946	0.32053	0	0	0.133074	0	0	0.226761	0.305578	0	0.251446	0.478289	0.515233	0.298165	0.239103	181.482	5.19501	1.69694	0.982729	0.604363	0	197.506	3.33475	4.21034	189.961	0.199978
18	Amnesia Haze	TRIMBOS Institute	s	1	0.487579	0.716595	0.923458	0.123131	0.169917	0	0.0517499	1.67954	0.216698	0.583624	0	0	0	0	0.206852	0	0	3.57949	1.25812	0.663604	0.794353	0.204748	0.530371	0.377425	0	0	0.323161	0.451439	0	0.160348	0	0.219557	0	0.0542315	194.985	11.4767	2.32284	1.24968	0.641657	0.0813153	224.534	5.15915	8.61685	210.758	0.0945076
19	Amnesia Haze	TRIMBOS Institute	s	1	0.242218	0.400387	0.444874	0	0.0568862	0.261972	0.108739	0.635167	0	0.318829	0	0	0	0	0.15818	0	0	1.35185	0.462989	0.203017	0.255005	0	0.220354	0	0	0	0.195595	0.237676	0	0.133695	0	0.11141	0	0	182.798	13.0208	2.33132	1.37239	0.573713	0	205.895	2.62725	3.17159	200.096	0.0921945
20	Amnesia Haze	TRIMBOS Institute	s	1	0.429098	0.877925	1.71393	0.150431	0.19482	1.43526	0.061652	2.82859	0	0.85573	0	0	0	0	0.254006	0	0	2.89045	1.01289	0.550916	0.751024	0	0.41751	0	0	0	0.442215	0.671969	0	0.3681	0	0.167992	0	0	195.013	15.9354	2.87057	1.45072	0.552787	0.0757627	231.973	8.80144	7.27307	215.899	0.0487532
21	Enemy of the State	TRIMBOS Institute	i	5	0.360103	0.556737	2.0943	0	0	0.0994989	0	0.189538	0.665709	1.79344	0.293772	0.215593	0	0.130296	0.379059	0	0	1.55455	0.595725	0.647938	0.844946	0	0	0.246829	0	0	0.270572	0.353626	0	0.448573	0.545854	0.574354	0.313298	0	184.21	4.39932	1.96793	0.544527	0.568779	0	204.865	6.77805	6.39626	191.69	0.0531279
22	Space Haze	TRIMBOS Institute	s	1	0.34034	0	1.25506	0	0	0.174934	0	0	0	0.0497162	0	0	0	0	0	0	0	0.295968	0.106542	0.0474331	0.108914	0	0	0.051994	0	0	0.0970637	0.160999	0	0	0.168072	0.196491	0.113649	0	132.82	7.20568	1.47897	0.849692	0.736788	0.153244	146.412	1.82005	1.34712	143.245	0.186995
23	Northern Lights	TRIMBOS Institute	i	5	0.312074	0.240659	2.29618	0	0	0	0	0	0.207081	0.292787	0	0	0	0	0.111964	0	0	0.715464	0.278915	0.30037	0.43395	0	0	0.193134	0	0	0.252959	0.350613	0	0.233793	0.124229	0.164734	0.15744	0	156.947	6.06206	1.47325	0.63091	0.549738	0	172.33	3.46074	3.2056	165.663	0.0901755
24	Haze	TRIMBOS Institute	s	1	0.229475	0.594807	0.562104	0.0494042	0.128842	0	0	1.33747	0.170956	0.435635	0	0	0	0	0.255247	0	0	2.31584	0.788296	0.389466	0.549218	0.11491	0.384774	0	0	0	0.36592	0.53735	0	0.312032	0	0	0	0.114974	191.751	17.8054	2.51285	1.37772	0.639541	0.125236	223.849	3.76394	5.87278	214.212	0.0609667
25	Haze	TRIMBOS Institute	s	1	0.47341	0.935025	0.544021	0.0495424	0.183727	0.383836	0.0493697	1.37296	0.178984	0.560526	0	0	0	0	0.261423	0	0	2.92955	1.03543	0.431647	0.542511	0.167486	0.33498	0	0	0	0.290142	0.391667	0	0.283093	0	0	0	0	184.414	11.3985	2.30699	1.27279	0.560013	0.117897	211.469	4.99282	6.40651	200.07	0.0948182
26	Amnesia Haze	TRIMBOS Institute	s	1	0.328689	0.711329	0.669101	0.0520106	0.143231	0.523604	0	1.5406	0.178464	0.558772	0.105634	0	0	0	0.281799	0	0	2.51939	0.922297	0.505557	0.642168	0.138815	0.399866	0	0	0	0.301084	0.432827	0	0.145822	0	0	0	0.122269	221.305	14.8655	3.01646	1.58174	0.756291	0.0726303	252.821	5.09324	6.1301	241.597	0.0645345
27	Amnesia	TRIMBOS Institute	s	1	0.252937	0.465709	0.723434	0	0.101663	0.936106	0	1.26237	0.141838	0.458621	0	0	0	0	0.103803	0	0	2.15481	0.755396	0.615699	0.762536	0	0.397821	0.684406	0	0	0.348111	0.627546	0	0.146787	0	0	0	0.118417	150.005	15.1974	3.22753	1.0006	0.562209	0.145273	181.196	4.44648	6.61153	170.138	0.0568848
28	Kush	TRIMBOS Institute	i	5	0.147346	0.294556	0.451254	0	0	0.141011	0	1.40813	1.41719	0.732326	0.501601	0.456066	0	0.218327	0.587454	0	0	0.899431	0.399823	1.55849	1.25143	0.143741	0	0	0	0	0	0	0	0.199979	0	0	0	0.372943	159.465	2.89515	1.47226	0.725412	0.741682	0	176.48	6.35526	4.82584	165.299	0.0231849
29	Amnesia	TRIMBOS Institute	s	1	0.412649	0.802023	0.75073	0	0.149201	0.559564	0.0488253	1.46191	0.170203	0.55255	0	0	0	0	0.233172	0	0	3.1551	1.38097	0.595601	0.777779	0.16119	0.453109	0	0	0	0.333973	0.272511	0	0.310656	0	0	0	0.135466	213.926	16.918	3.11405	1.52541	0.771987	0.130026	249.103	5.14083	7.57636	236.386	0.0802691
30	Amnesia Haze	TRIMBOS Institute	s	1	0.31019	0.627371	0.720666	0	0.0629925	0.764984	0	1.8215	0.223901	0.508435	0	0	0	0	0.233227	0	0	3.72897	1.3528	0.570089	0.740657	0.156543	0.441589	0	0	0	0.331773	0.558411	0	0.252335	0	0	0	0.121495	191.042	14.8722	2.73605	1.31894	0.668761	0.156579	224.322	5.27326	8.25466	210.794	0.0588232
31	Amnesia Haze	TRIMBOS Institute	s	1	0.146988	0.272423	0.371667	0	0	0.322094	0	0.474504	0.10669	0.236958	0	0	0	0	0.118283	0	0	2.35473	0.842641	0.510681	0.544182	0.158962	0.375241	0	0	0	0.213662	0.344653	0	0	0	0	0	0	137.205	5.62681	2.22	0.87527	0.498891	0.145922	153.966	2.04961	5.34475	146.572	0.0717154
32	Amnesia Haze	TRIMBOS Institute	s	1	0.264605	0.626568	0.769926	0	0.123826	0.650758	0.111931	1.398	0.148116	0.497983	0	0	0	0	0.259748	0	0	2.78365	0.988307	0.37979	0.547935	0.111731	0.367075	0	0	0	0.445139	0.660452	0	0.375123	0	0	0	0.155729	193.301	17.871	3.40813	1.34973	0.662512	0	228.259	4.85146	6.81493	216.592	0.0545414
33	Northern Lights	TRIMBOS Institute	i	5	1.06222	0.486941	2.44913	0	0	0.183849	0	0.126561	0.350884	0.355632	0	0	0	0	0.391466	0	0	1.32016	0.483065	0.334854	0.394602	0	0	0.169799	0	0	0.308483	0.444837	0	0.420892	0.521416	0.583589	0	0.353975	190.525	7.13426	2.08087	1.11937	0.431914	0	212.034	5.40667	5.33567	201.292	0.196464
34	Amnesia Haze	TRIMBOS Institute	s	1	0.276458	0.617279	0.512396	0	0.116779	0.264529	0.102488	0.881682	0.0977209	0.409917	0	0	0	0	0.204967	0	0	1.83352	0.654154	0.288893	0.334236	0.114595	0.255458	0	0	0	0.267367	0.341361	0	0.207698	0	0	0	0	176.217	10.959	2.67672	1.39122	0.648171	0	199.674	3.48421	4.29728	191.892	0.0793459
35	Amnesia	TRIMBOS Institute	s	1	0.385418	0.751695	0.529153	0	0.160467	0.311294	0.114886	1.3716	0	0.536314	0	0	0	0	0.174551	0	0	3.89994	1.35698	0.580143	0.563279	0.184586	0.270913	0	0	0	0.23001	0	0	0.316405	0	0	0	0	163.431	15.0024	2.24711	0.735753	0.563671	0.136206	193.854	4.33538	7.40226	182.117	0.0889007
42	Pure Haze, Seedbank Amsterdam	Bedrocan	h	3	0.458832	0.40262	2.50913	0	0	0.90424	0	0.921842	0.0485759	0.20141	0	0	0	0	0.351215	0	0	0.727362	0.253114	0.238316	0.258031	0	0.285196	0	0	0	0.162188	0.240699	0	0.255548	0	0	0	0	121.266	10.2741	2.51374	0.661797	1.14601	0	144.08	5.79787	2.42045	135.861	0.0791381
43	Afghaan Kush, Sensi Seeds	Bedrocan	i	5	0.596682	0.350632	1.79067	0	0	0	0	0	0	0.348254	0	0	0	0	0.218863	0	0	0.974104	0.293936	0.356084	0.482917	0	0.229126	0	0	0	0	0	0	1.00353	0	0	0	0.219347	95.5978	6.18996	2.22443	0.704776	0.798217	0	112.379	3.3051	3.55905	105.515	0.180534
44	patient from Rotterdam	Bedrocan	i	5	0.205654	0.41134	0.614284	0.0541746	0.0689495	1.01768	0	1.99049	0	0.398873	0	0	0	0	0.21806	0	0	0.701812	0.195874	0.213359	0.248143	0	0	0	0	0	0	0	0	0.612942	0.449199	0.476614	0.27306	0	57.2857	2.26634	2.86565	0.242304	0.270605	0	71.0811	4.9795	3.171	62.9306	0.0413002
45	K2x ( Durban x New York Diesel )	Bedrocan	i	5	1.17328	0.724318	3.93993	0	0	0	0	0	0	1.03451	0.128965	0.0497948	0	0	0.277728	0	0	0.561394	0.163993	0	0	0	0	0	0	0	0.146614	0.208727	0	0	0.370106	0.377608	0.173849	0	93.2798	0.999168	1.31187	0.155219	0.434517	0	105.511	7.32853	2.00229	96.1806	0.160097
47	Afghaan	Bedrocan	i	5	1.06707	0.601596	9.36269	0	0	0.247285	0	0	0.212934	1.01481	0.121319	0	0	0	0.287094	0	0	1.18734	0.384394	0.272523	0.614633	0	0	0	0	0	0	0	0	0.795837	0.875343	0.954646	0.397073	0.391961	151.509	9.87002	2.39401	0.532428	0.597528	0	183.691	12.9148	5.87375	164.903	0.0826239
48	50/50 Indica/ Sativa.<U+00A0>	Bedrocan	h	3	4.53059	2.026	1.68475	0	0	0.179406	0	0	0	1.05155	0.152004	0.114613	0	0	0.229215	0	0	1.83969	0.564169	0.16973	0.441814	0	0.237117	0	0	0	0	0	0	1.44521	0.354447	0.394373	0.14726	0.584104	117.967	2.23114	1.8089	0.932827	0.7542	0	139.84	9.96812	6.17791	123.694	0.454507
49	Fruit spirit	Coffeeshop	hi	4	0.158	0.301243	3.42846	0	0	0	0	0	0.85223	1.29082	0.162773	0.135456	0	0	0.319643	0	0	2.59969	0.830977	0.505859	0.833808	0	0.415582	0	0	0	0.143247	0	0	0.747056	0.83928	0.938929	0.360599	0.352355	176.459	5.05249	1.96157	0.697826	0.992363	0	200.379	6.64862	8.56738	185.163	0.0237643
50	Buddha Kush	Coffeeshop	hi	4	1.26227	0.642705	1.65881	0	0	0	0	0.191427	0.537955	1.00475	0.242562	0.176211	0	0	0.280165	0	0	1.82193	0.711399	0.630299	0.85586	0	0.152712	0.269298	0	0.21264	0.295925	0.472762	0	0	0.221048	0.351652	0.185083	0.296537	158.039	17.5062	1.91807	3.5797	0.73854	0	194.256	5.99685	6.47715	181.782	0.210488
58	Bedica	Bedrocan	i	5	3.4803	1.12362	13.3045	0	0	1.80421	0	0	0.629885	0	0	0	0	0	0.224203	0	0	1.70855	0.521382	0.197874	0.668461	0	0	0.371661	0	0	0.229921	0.131003	0	0.497324	0.489318	0.521394	0.278073	0.86097	130.343	8.18505	1.61575	0.762289	0.525368	0.121476	168.595	20.5667	6.47593	141.553	0.16922
59	Bedropuur	Bedrocan	i	5	0.429624	0.890681	1.11043	0	0	0	0	0	0.772625	4.84912	0.35092	0.248824	0	0.110056	0.316928	1.29314	0	2.67831	0.760819	0.564075	0.915701	0	0.419893	0.128519	0	0	0	0	0	1.53673	0.632178	0.710819	0.309682	0.477052	198.276	3.35155	2.28283	1.36155	0.986335	0	225.764	9.07921	10.4269	206.258	0.0473196
60	Bediol	Bedrocan	s	1	0.723636	0.445511	6.91698	0	0	0.463837	0	0.676938	0	0.290817	0	0	0.23084	0	0.537289	0	0	0.82963	0.283579	0.186484	0	0	0.291433	0.344006	0	0	0.228405	0.422644	0	0.178581	0	0	0	0	62.7396	2.05139	6.99323	0	72.7271	1.26491	158.827	10.2859	2.76476	145.776	0.0703526
61	aw4	Bedrocan	i	5	0.171696	0.382417	2.63564	0	0	0	0	0	0.38765	1.22544	0.221101	0.166478	0	0	0.202922	0	0	0.92537	0.320579	0.221565	0.422221	0	0	0.291912	0	0	0	0.169304	0	0.156348	0.750543	0.711477	0.396181	0.701219	72.574	1.58968	6.67536	0	68.6791	0.920592	160.899	5.39335	5.06672	150.439	0.0318349
62	Bedrolite	Bedrocan	s	1	0.411555	0.338445	1.74636	0	0	0.197653	0	0.360106	0	0.227434	0	0	0.240982	0	0.119123	0	0	0.77843	0.279372	0	0	0	0.122059	0	0	0.200702	0.149178	0.282108	0	0	0	0	0	0	6.6757	0.335797	5.49921	0	71.9264	1.23539	91.126	3.64165	1.81185	85.6725	0.113013
63	Bedrocan	Bedrocan	s	1	0.610251	1.26127	4.70265	0.255682	0.388167	2.83421	0.217023	5.0365	0.173674	1.59353	0.0582091	0	0	0.742875	0	0	0	1.70988	0.576262	0.412513	0.445797	0	0.340175	0.450822	0	0	0.352945	0.447496	0	1.14694	0	0	0	0	217.641	11.4993	2.67435	1.41525	1.53796	0	258.524	17.874	5.88283	234.767	0.0341418
64	Bedrobinol	Bedrocan	s	1	2.24689	0.717334	9.47652	0	0	0.524568	0	0	0	0.20058	0	0	0	0	0	0	0	0.901715	0.365883	0.268132	0.397131	0	0	0.149441	0	0	0	0	0	0.257846	0	0.0513228	0	0	129.759	2.2093	1.76994	0.863196	0.593965	0	150.753	13.1659	2.39147	135.195	0.17066
70	A1	HempFlax	i	5	0.766877	0.641819	11.8544	0	0	0.811356	0	0	0	1.74498	0	0	0	0	0	0	0	1.97512	0.880353	0.148558	0.185691	0	0.17429	0.205823	0	0	0.0856655	0	0	0.651324	0.397141	0.400042	0.211451	0.139971	105.143	1.32389	0.95071	4.37922	0.499057	0	133.57	15.8194	5.45543	112.296	0.0484771
71	A2	HempFlax	i	5	0.839689	0.722539	14.5464	0	0	0.820092	0	0	0	2.14246	0	0	0	0	0	0	0	1.93992	0.61695	0.146341	0.192265	0	0.198004	0.166434	0	0	0.0918328	0.272637	0	0.746187	0.421839	0.447591	0.24679	0.140603	116.261	1.58756	1.07501	5.48514	0.533854	0	149.641	19.0712	5.62739	124.942	0.0440292
72	A3	HempFlax	i	5	0.752692	0.680108	12.9753	0	0	0.772345	0	0	0	1.75354	0	0	0	0	0	0	0	1.47654	0.498841	0.134832	0.157825	0.0631301	0.154813	0.149312	0	0	0.0659096	0.194949	0	0.573671	0.352774	0.358508	0.195124	0.108826	109.637	1.71245	0.976641	5.37415	0.512	0	139.631	16.934	4.48506	118.212	0.0444486
73	A4	HempFlax	i	5	0.935643	0.752977	13.0087	0	0	0.643677	0	0	0	1.8856	0	0	0	0	0	0	0	1.25395	0.436442	0.121478	0.153249	0	0.150388	0.124162	0	0	0.0606799	0.199504	0	0.494734	0.323843	0.338446	0.18502	0.153367	104.568	1.68539	0.878075	10.8212	0.334455	0	139.509	17.2266	3.99527	118.288	0.0543139
74	A5	HempFlax	i	5	0.798466	0.305835	8.05012	0	0	0.736142	0	0	0.101955	0	0	0	0	0	0.730652	0	0.0728892	1.69554	0.442802	0.434016	0.363965	0.0699604	0.241797	0.399081	0	0	0.0699003	0.498088	0.244726	0.751451	0	0.0347847	0	0	105.731	5.06301	0.899534	0.567903	0.475641	0.781893	129.561	10.7232	5.319	113.519	0.0744617
75	A6	HempFlax	i	5	0.829997	0.346722	10.5311	0	0	0.986321	0	0	0.122229	0	0	0	0	0	0.920967	0	0	1.91482	0.531975	0.575951	0.543767	0.0759838	0.321574	0.532063	0	0	0.0935346	0.526271	0.277708	1.10795	0	0	0	0	120.987	5.14012	0.962133	0.640233	0.529156	0.880644	149.378	13.7374	6.5016	129.139	0.0604189
76	A7	HempFlax	i	5	0.700817	0.298404	10.0212	0	0	0.836098	0	0	0.115398	0.129397	0	0	0	0	0.824803	0	0	1.73459	0.431569	0.431342	0.385004	0.028799	0.309965	0.333069	0	0	0.0810911	0.582005	0.248968	0.721472	0	0	0	0	112.096	4.58466	0.967656	0.663289	0.517066	0.773346	137.816	12.9261	5.28788	119.602	0.0542173
77	A8	HempFlax	i	5	0.677141	0.321723	10.8822	0	0	0.967952	0	0	0.125901	0.156844	0	0	0	0	0.903626	0	0.0286132	1.95896	0.483198	0.569678	0.523577	0.0604078	0.336439	0.394081	0	0	0.0776397	0.653104	0.241791	0.79665	0	0.0604398	0	0	121.397	5.2581	1.00158	0.724747	0.506143	0.877591	149.985	14.0354	6.18458	129.765	0.0482451
78	A9	HempFlax	i	5	4.04147	1.16324	6.80452	0	0	1.53936	0	0	0	1.53701	0.0760812	0.0620419	0	0	0.109876	0	0	2.29476	0.672632	0.430004	0.706095	0	0.136359	0	0	0	0.226372	0	0	1.71863	0.902982	0.801641	0.461391	0.475831	131.653	2.17573	1.64633	1.28285	0.588177	2.04319	163.549	15.3336	8.8267	139.389	0.263569
79	A10	HempFlax	i	5	3.04196	0.98151	6.82839	0	0	2.47095	0	0	0	1.60632	0	0	0	0	0	0	0	2.66469	0.711356	0.275376	0.654037	0	0.109035	0.0974307	0	0	0.0888864	0.0688439	0.390041	0.811635	0.567866	0.547811	0.289656	0.743003	134.847	4.78214	1.68117	4.92381	0.751438	1.51056	171.445	14.9291	8.01966	148.496	0.20376
80	A11	HempFlax	i	5	1.18835	1.31783	10.2128	0	0	1.67824	0	2.2209	0.149564	1.88104	0.0997095	0.0352143	0	0	0.271705	0	0	0.356783	0.135512	0.164395	0.148023	0	0.10773	0.256178	0	0	0.0779983	0.124102	0	0.523593	0.691636	0.611687	0.425322	0.167831	136.425	6.05236	1.14244	0.918246	0.549261	0.603269	168.536	19.0553	3.79079	145.69	0.062363
81	A12	HempFlax	i	5	1.7471	0.643638	10.4542	0	0	1.9175	0	0	0	0.926954	0	0	0	0	0	0	0	2.03149	0.543228	0.237611	0.498152	0	0.10201	0.135931	0	0	0.0763115	0.0650733	0.342389	0.681721	0.469767	0.489599	0.206747	0.577685	134.921	3.54837	1.53315	4.75194	0.691109	1.28578	168.878	15.6894	6.45771	146.731	0.111355
82	A13	HempFlax	i	5	1.24342	1.27032	10.3508	0	0	1.72926	0	1.63496	0.160184	1.92485	0.113915	0.0895566	0	0	0.284957	0	0	0.382188	0.125618	0.117217	0.0976974	0	0.0837622	0.256921	0	0	0.0726441	0.117167	0	0.419062	0.675732	0.594887	0.404926	0.136786	138.227	6.8868	1.20848	0.989559	0.590233	0.702944	170.892	18.8022	3.48461	148.605	0.0661318
83	A14	HempFlax	i	5	0	0	13.0844	0	0	0.577255	0	0	0.455536	0.880598	0.066681	0	0	0	0.0972725	0	0	1.02239	0.374146	0.165625	0.151306	0	0.171461	0.154073	0	0	0	0.259959	0.480092	0.314104	0	0	0	0	117.778	1.58014	1.5943	0.80964	0.470159	0.0465258	140.534	15.1617	3.09316	122.279	0
84	A15	HempFlax	i	5	0	0	8.52971	0	0	0.494279	0	0	0.414536	1.05965	0.0302662	0	0	0	0.10158	0	0.030989	1.23699	0.305039	0.192043	0.237221	0	0.23151	0.14684	0	0	0.0734136	0.364225	0.217424	0.655127	0.350204	0.350152	0.192005	0.144023	153.045	1.70865	1.89433	1.23665	0.568314	0.750534	174.561	10.63	4.72721	159.204	0
85	A16	HempFlax	i	5	0	0.187703	6.7068	0	0	0.442457	0	0	0.297711	0.919737	0	0	0	0	0	0	0	1.33493	0.347543	0.245489	0.306186	0	0.154457	0.0799867	0	0	0.0800112	0.264816	0.215141	0.794412	0.328228	0.372374	0.162701	0.0827635	135.053	1.97607	1.55017	1.12773	0.534174	0.485324	154.05	8.55441	4.76904	140.727	0
86	A17	HempFlax	i	5	0	0.189611	7.71014	0	0	0.274885	0	0	0	0.957074	0	0	0	0	0	0	0	1.14915	0.285852	0.206512	0.274612	0	0.189858	0.0990306	0	0	0.0792575	0.297422	0.198226	0.819	0.351163	0.362485	0.167131	0.127667	124.709	1.19286	1.47212	1.0107	0.519787	0.584175	143.228	9.13171	4.60737	129.489	0
87	A18	HempFlax	i	5	0.234474	0.586206	18.7498	0	0	0	0	0.111779	0.428092	3.10818	0.20177	0.149971	0	0	0.218139	0	0	0.945126	0.412268	0.126203	0.213129	0.112189	0.255203	0.067307	0	0	0.0308212	0.426263	0	0.611327	0.45151	0.485154	0.24398	0.0645	180.664	1.82813	1.82817	0.940724	0.660272	0.127774	214.282	23.7884	4.44498	186.049	0.00985668
88	A20	HempFlax	i	5	0	0.138408	8.69843	0	0	0.28214	0	0	0.218259	0.415225	0	0	0	0	1.25632	0.273768	0.629667	1.21006	0.427079	0.0602291	0.109507	0	0.246392	0.125933	0	0	0	0.421603	0.240916	0.213539	0	0.136884	0	0.191638	109.926	1.73958	1.30988	0.46435	0.450488	0.47128	129.658	11.0088	4.28721	114.362	0
89	A21	HempFlax	i	5	0	0.227331	7.90556	0	0	0.568328	0	0	0.385387	1.4995	0.0886987	0.0637726	0	0	0.121879	0	0	1.1577	0.310818	0.256545	0.32218	0	0.171142	0.116869	0	0	0.079827	0.250885	0.222501	0.76997	0.402091	0.367837	0.179548	0.125359	153.628	2.14435	1.9558	1.31704	0.599095	0.790222	176.028	10.8605	4.73327	160.434	0
90	A22	HempFlax	i	5	0	0.396936	11.2465	0	0	0	0	0	0.303215	2.08391	0.126799	0.104747	0	0	0.435527	0.266508	0.606731	1.00933	0.459301	0.0623742	0.130419	0.073715	0.340223	0	0	0	0	0.425279	0	0.260838	0.351564	0.334553	0.249497	0.0793853	135.883	1.34218	1.65799	0.75363	0.50242	0.136371	159.623	14.6976	4.64971	140.276	0
91	A23	HempFlax	i	5	0.198994	0.182952	11.1366	0	0	3.50095	0	0	0.155901	0.249914	0	0	0	0	0.766344	0	0	1.32196	0.378872	0.226571	0.304159	0	0.0663523	0.182557	0	0	0	0	0.409261	0.281864	0.0939547	0.0995284	0	0.293189	135.688	11.9751	2.32336	0.851015	0.507394	0.126149	171.321	16.1917	3.65827	151.471	0.0122899
92	A24	HempFlax	i	5	0.787501	0.360335	8.71987	0	0	0.410644	0	0	0.20659	0.131266	0.0553828	0.0443063	0	0	0.0692286	0	0	0.608983	0.209592	0.166487	0.24401	0	0.0631864	0.15519	0	0	0	0	0.16943	0.298412	0.284363	0.221081	0.137957	0.287402	87.6998	4.9599	1.40334	10.557	0.410775	1.25774	119.92	10.7851	2.84609	106.288	0.0730173
93	A25	HempFlax	i	5	0.825765	0.633892	11.6729	0	0	0.487436	0	0	0.181104	1.72066	0.111921	0.0932866	0	0	0.135884	0	0	1.4052	0.446489	0.101401	0.131529	0	0.145157	0.115087	0	0	0	0.216343	0	0.443706	0.295852	0.30948	0.172617	0.126048	88.9635	0.881023	0.853239	3.94383	0.433501	0	114.847	15.8628	3.90891	95.0751	0.0520567
94	A27	HempFlax	i	5	0.16864	0.233956	8.2265	0	0	0.454318	0	0	0.277501	1.0665	0.0571287	0	0	0	0.0816093	0	0	1.07453	0.271431	0.131511	0.139897	0	0.170688	0.123113	0	0	0	0.235051	0.159495	0.428099	0.274225	0.246239	0.153904	0.100723	124.439	1.68227	1.58673	2.25925	0.502925	0.534797	145.08	10.5662	3.50891	131.005	0.0159604
95	A28	HempFlax	i	5	5.1465	2.18081	9.35008	0	0	0.67426	0	0	0.200171	2.26509	0.147494	0.115888	0	0	0.163297	0	0	0.493041	0.162541	0	0.102943	0	0.130033	0.0704345	0	0	0	0.146287	0.108361	0	0	0	0.0541803	0.102943	70.2535	0.740666	2.0917	3.61418	0.246889	0	98.5613	20.2436	1.37076	76.947	0.254228
96	A29	HempFlax	i	5	0.712784	0.339943	12.715	0	0	1.29946	0	0	0	0.164489	0	0	0	0	0	0	0.0958712	0.766969	0.2143	0.225579	0.372206	0	0.0902317	0.180463	0	0	0	0	0.180463	0.411682	0.225579	0.225579	0.129708	0.304532	102.82	5.76776	1.82027	0.485406	0.414023	0	129.963	15.2316	3.42316	111.308	0.0467963
97	A31	HempFlax	i	5	1.01147	0.422785	15.7019	0	0	1.2523	0	0	0	0.176606	0	0	0	0	0.272937	0	0	0.533936	0.15963	0.154126	0.242198	0	0	0.121099	0	0	0	0	0.143117	0.242198	0.198162	0.209171	0.115594	0.231189	106.762	7.39247	1.33775	0.557396	0.418047	0	137.656	18.838	2.35042	116.468	0.0536932
98	A32	HempFlax	hi	4	1.38325	1.32071	8.44647	0.122829	0.287674	1.04634	0	2.02787	0.112473	1.37589	0.0341207	0.0262467	0	0	0.957183	0.384596	0.596983	0.239383	0.0941294	0.0296955	0.118384	0	0	0.139876	0	0	0	0	0	0.196232	0.260854	0.271611	0.150653	0.201694	146.606	2.34196	1.27679	0.752469	0.622964	0	171.426	17.1411	2.68409	151.601	0.0806981
99	A33	HempFlax	hi	4	1.27452	1.29853	7.98967	0.109108	0.284712	1.05659	0.0777376	1.58376	0.106467	1.60701	0.0877026	0.0744989	0	0	1.00569	0.413293	0.596504	0.199836	0.0876132	0	0.109424	0	0	0.109465	0	0	0	0	0	0.136832	0.199754	0.20535	0.117696	0.199877	142.854	2.13734	1.23338	0.762072	0.599447	0	166.518	16.556	2.37564	147.586	0.0769826
100	A34	HempFlax	hi	4	1.29934	1.31283	8.61121	0.0998203	0.289726	1.03025	0.0521354	1.28162	0.124361	1.64467	0.100131	0.0950305	0	0	1.13791	0.406791	0.575521	0.236465	0.0918595	0.0301677	0.119524	0	0.0310453	0.125248	0	0	0	0	0	0.155416	0.247435	0.236306	0.144685	0.205739	139.861	2.83212	1.2534	0.728379	0.566977	0.0880983	165.015	17.079	2.6062	145.329	0.0760781
101	A35	HempFlax	hi	4	1.21946	1.16933	8.19862	0.100304	0.263959	1.0611	0	1.26712	0.113506	1.24324	0.0659793	0	0	0	0.968726	0.385536	0.583695	0.219914	0.0814555	0	0.0896039	0	0.0353406	0.089611	0	0	0	0	0	0.114028	0.192743	0.187328	0.116732	0.165644	134.375	2.29202	1.18557	0.72509	0.58418	0.0962313	157.191	15.6713	2.26163	139.258	0.0778143
102	A36	HempFlax	hi	4	2.55265	1.3046	11.9024	0	0	0.283784	0	0	0.164805	1.31535	0.124249	0.0999261	0	0	0.648362	0.263913	0.591737	0.213878	0.0888469	0.0555635	0.0805534	0	0.0611198	0.086055	0	0	0	0.0307103	0	0.202848	0.200001	0.197209	0.116656	0.130588	142.692	0.973789	1.35721	0.629341	0.685778	0.882636	167.936	18.3962	2.31968	147.221	0.13876
103	A38	HempFlax	hi	4	1.2026	1.24011	10.0804	0	0.287631	1.51387	0	1.60716	0.144006	1.91133	0.114589	0.0852993	0	0	0.509098	0.378485	0.595047	0.284941	0.101476	0.0985705	0.106828	0	0.0878651	0.200046	0	0	0	0.0988319	0	0.364483	0.605948	0.553693	0.337327	0.112769	127.495	6.89321	1.11821	0.850284	0.559269	0.750098	160.289	18.6961	3.92631	137.666	0.0643237
104	A40	HempFlax	hi	4	7.99499	3.20629	5.54382	0	0	0.393297	0	0	0.25218	2.41588	0.188673	0.140871	0	0.0342397	0.342861	0.218795	0.560608	0.729477	0.218643	0	0.169476	0	0.0710918	0.0325082	0	0	0	0	0.276089	0.131145	0	0.0819785	0	0.229732	97.8423	2.71299	1.81402	5.67683	0.439709	0.117994	131.836	20.5131	2.71954	108.604	0.389751
105	A41	HempFlax	hi	4	0.384802	0.0950666	10.6472	0	0	1.95303	0	0	0.121244	0.160726	0	0	0.0843379	0	0.827663	0.230454	0.580219	0.225003	0.0324799	0.0731934	0.0813323	0	0.0840295	0.0976006	0	0	0	0.1518	0.0297732	0.0867456	0	0	0	0	105.685	7.44384	0.929962	0.562742	0.360332	0.109812	131.039	14.2741	1.67263	115.092	0.026958
106	A42	HempFlax	hi	4	1.0363	0.59656	18.3886	0	0	0.567891	0	0.0508811	0.29435	1.02969	0.0288212	0	0.0914339	0	1.07192	0.230425	0.575357	1.02449	0.357782	0.175396	0.233119	0	0.34462	0.196017	0	0	0	0.524467	0	0.580434	0.418043	0.454833	0.240422	0.321461	190.386	2.9851	2.05154	1.08741	0.768217	0.109003	226.22	23.1565	5.67686	197.387	0.0447521
107	A43	HempFlax	hi	4	1.28646	1.27856	10.368	0.175809	0.303627	1.70451	0.133184	2.50674	0.149168	1.82966	0.109222	0.0878997	0	0	0.527483	0.361656	0.66588	0.290423	0.0986439	0.167122	0.178102	0	0.0876738	0.309598	0	0	0.0685076	0.0986439	0	0.616539	0.687763	0.63297	0.33151	0.136976	130.322	5.90968	1.2729	0.891364	0.530678	0.832236	164.951	20.4603	4.73201	139.759	0.0628759
108	A44	HempFlax	hi	4	0.537921	0.390361	2.64592	0	0	0.401421	0	0.712819	0	0.778157	0.065511	0	0	0	0.31672	0.306095	0.682406	0.80893	0.24433	0.117948	0.148848	0	0.0898475	0.027994	0	0	0.0617824	0.146031	0.0786321	0.544826	0	0	0	0.0702162	30.4111	0.394444	0.952493	1.51395	0.145663	0.590097	43.1845	5.84883	3.32789	34.0078	0.0919707
109	A45	HempFlax	h	3	0	0.172322	10.6727	0	0	0.0318841	0	0.074245	0.283637	0.758066	0	0	0	0	0.315486	0.310828	0.730767	3.55814	0.842515	0.411669	0.550733	0	0.629699	0.583504	0	0	0.109087	1.04427	0.507139	1.24862	0	0.259023	0	0.171751	206.669	5.50118	2.69872	1.52536	0.710942	0.144968	240.516	12.3084	10.9577	217.25	0
110	A46	HempFlax	h	3	0.170227	0.364196	8.5691	0	0	0	0	0.0657035	0.466015	1.69427	0.123129	0.0916567	0	0	0.725687	0.31269	0.725723	1.7001	0.546954	0.350456	0.391059	0	0.323143	0.372317	0	0	0.0837082	0.468866	0.627993	0.920115	0	0.153619	0	0.107845	171.979	4.20497	2.51171	1.26272	0.651633	0.112642	200.077	12.27	7.08459	180.722	0.0138735
111	A47	HempFlax	h	3	0.173906	0.384707	9.67295	0	0	0	0	0	0.466385	1.96833	0.134383	0.110664	0	0	0.729885	0.271022	0.682975	2.1004	0.715488	0.298117	0.333346	0	0.355033	0.390257	0	0	0.0840174	0.468871	0.620632	0.897066	0	0.151778	0	0.113826	160.528	3.35846	2.59005	1.11834	0.61063	0.0857642	189.415	13.6412	7.48283	168.291	0.0127486
112	A48	HempFlax	h	3	1.30163	1.33344	9.74526	0	0.30795	1.60637	0	0.958917	0.174734	1.69824	0.0912918	0.119743	0	0	0.46694	0.434675	0.552654	0.423802	0.158301	0.109906	0.12064	0.0297732	0.128667	0.262747	0	0	0.0405998	0.126192	0	0.38679	0.630869	0.547658	0.43486	0.177201	151.422	5.73086	1.33474	1.0903	0.587593	0.82164	183.357	17.8045	4.56533	160.987	0.0731069
113	A49	HempFlax	hi	4	0.999247	0.748239	5.29241	0	0	0.799243	0	0.667497	0	1.60868	0.116257	0.0811603	0	0	0.332324	0.358968	0.544705	0.619006	0.183395	0.054802	0.105318	0	0.144237	0.094358	0	0	0	0.191456	0.083318	0.404594	0	0	0	0.0721187	49.8235	0.584315	1.01445	2.731	0.231734	1.12816	69.0145	10.6451	2.85628	55.5131	0.0938696
114	A50	HempFlax	h	3	0.120118	0.21295	0.728959	0.0353821	0.0737106	0.854641	0	0.927453	0	0.215723	0	0	0	0	0.300338	0.252817	0.581361	2.19321	0.954801	0	0.106679	0.0645818	0.160081	0.300496	0	0	0	0.283753	0	0	0	0.0870659	0	0.213466	39.376	1.62066	0.547284	0.536766	0.21319	0.945654	51.9071	3.46927	5.19831	43.2395	0.0346233
115	A51	HempFlax	h	3	0.135131	0.209602	0.750135	0	0.0744632	0.91836	0	0.358438	0	0.281309	0	0	0	0	0.297843	0.323385	0.587154	2.03666	0.842469	0	0.0964405	0	0.187213	0.280824	0	0	0	0.320514	0	0	0	0.0992783	0	0.178703	39.3994	1.55831	0.524215	0.477539	0.168748	0.969403	51.0755	3.02528	4.95264	43.0976	0.0446674
116	A52	HempFlax	h	3	0.130081	0.192713	0.688948	0	0.0674495	0.814212	0	0.544414	0	0.313158	0	0	0	0	0.115628	0.109018	0.0891965	2.14072	0.956385	0	0.109018	0	0.158572	0.336965	0	0	0	0.227947	0	0	0	0.0743304	0	0.163527	38.9891	1.49283	0.627238	0.476701	0.200716	0.953401	49.9723	2.8666	4.36567	42.74	0.0453782
117	A53	HempFlax	h	3	0.338656	0.757424	14.8221	0	0	0	0	0.0640452	0.581634	3.93203	0.304576	0.245979	0.0812242	0.0697715	1.74685	0.351089	0.592032	1.97579	0.678777	0.300872	0.407469	0.0750846	0.550327	0.209431	0	0	0	0.682193	0	1.55607	0	0.160762	0	0.217142	157.816	2.09368	1.77255	0.670652	0.507092	0.130488	193.692	22.9443	7.75704	162.99	0.0147599
118	A54	HempFlax	h	3	1.45107	1.42648	10.2206	0.176686	0.290375	1.66485	0.130485	3.32713	0.147987	1.89483	0.116791	0.091193	0	0	0.353877	0.0955967	0.0792806	0.286209	0.106345	0.136484	0.166622	0	0.0820644	0.21039	0	0	0	0.114697	0	0.577428	0.661212	0.636932	0.344477	0.139268	145.951	4.69675	1.28594	0.875195	0.56539	0	178.304	21.2924	3.63701	153.374	0.0681497
119	A55	HempFlax	h	3	0.0438265	0.220823	10.3286	0	0	0	0	0.0326559	0.270821	1.06264	0.0647953	0	0	0	0.135481	0.0848584	0.14701	3.66191	0.873285	0.373404	0.517564	0	0.579536	0.494497	0	0	0	0.943895	0.494587	1.1593	0	0.0707454	0	0.169582	175.57	3.798	2.58691	1.21862	0.62285	0.118492	205.644	12.1597	9.57017	183.914	0.00360425
120	A56	HempFlax	h	3	1.27009	1.18427	8.55309	0.0858169	0.268893	1.35591	0.0972592	0.984034	0.137307	1.47033	0.0800958	0.0629324	0	0	0.257451	0.181225	0.0768833	0.274583	0.09885	0.0768833	0.0878666	0	0.082375	0.225158	0	0	0	0.104342	0	0.367942	0.5931	0.499742	0.378925	0.142783	118.59	3.36261	1.13572	0.720029	0.482494	0	143.289	15.8075	3.19066	124.29	0.0803474
121	A57	HempFlax	h	3	0.284977	0.625168	9.55501	0	0	0.0316391	0	0	0.363765	3.55018	0.223842	0.188932	0	0	0.307931	0.0365957	0.167333	2.62298	0.64952	0.354264	0.328874	0.0365957	0.446619	0.354318	0	0	0	0.599823	0.688552	0.819289	0	0	0	0.153475	221.247	4.62988	2.8475	1.81794	0.761231	0	253.693	15.1314	7.25824	231.303	0.0188335
122	A59	HempFlax	h	3	0.844659	1.53902	2.45162	0.123428	0.531461	1.55159	0.206786	1.40604	0.0321096	1.77861	0.0291905	0.241914	0	0	0.879588	0.297834	0.0908403	1.72692	0.413319	0.187189	0.170759	0	0.283538	0.256283	0	0	0	0.426755	0	0.517404	0	0.0936423	0	0.0881339	176.959	4.90228	3.02776	0.736852	0.673242	0.0530233	202.521	11.616	4.55262	186.353	0.072715
123	A60	HempFlax	h	3	0.229029	0.492829	7.28742	0	0	0	0	0	0.310141	2.67564	0.168125	0.147829	0	0	0.249293	0.0695762	0.1419	2.54859	0.606542	0.166955	0.192002	0	0.489719	0.258776	0	0	0	0.573235	0.520386	0.431389	0	0	0	0.147481	173.183	3.01965	2.4822	1.30115	0.631793	0	198.324	11.5603	6.14656	180.618	0.0198117
124	A61	HempFlax	h	3	1.42617	0.751442	17.8799	0	0	0.390294	0	0	0.319958	1.23844	0.0646698	0.0704382	0.1176	0	0.809735	0.0846137	0.0788819	0.834284	0.278953	0.0387594	0.112786	0	0.228243	0.149458	0	0	0	0.408447	0	0.236451	0.275989	0.304356	0.220132	0.253452	179.811	1.89197	1.74819	1.00465	0.693446	0.136955	211.86	23.0686	3.50481	185.287	0.061823
125	A62	HempFlax	h	3	0.268435	0.877253	10.8881	0	0	0	0	0	0.459064	2.92171	0.207999	0.170391	0.0290824	0	0.277199	0.0582411	0.149714	2.98586	0.734687	0.183213	0.199771	0.102601	0.513004	0.316101	0	0.0720844	0	0.582449	0.579849	0.400001	0	0.115641	0	0.180268	192.997	4.02311	3.17184	1.53286	0.741902	0.13858	225.878	16.0992	7.17349	202.605	0.0166738
126	A63	HempFlax	h	3	0.809846	1.43401	4.88901	0.0288951	0.449327	1.77452	0.169057	0.630764	0.165894	2.05534	0.105926	0.360409	0	0	0.689691	0.269186	0.0906883	1.02138	0.310212	0.109946	0.0742043	0	0.211361	0.120883	0	0	0	0.236113	0.148409	0.208903	0	0	0	0	182.931	7.03085	1.8412	1.36247	0.608804	0.226845	210.365	13.5627	2.80128	194.001	0.0597113
127	A64	HempFlax	h	3	2.86194	0.976012	6.76259	0	4.21549	0.72395	0	0	0.0717219	0.95065	0.066037	0.0631945	0	0	0.126334	0.0633355	0.074355	0.427031	0.140472	0	0	0	0.107466	0.074355	0	0	0	0.181768	0	0	0	0	0	0	71.4198	0.659345	3.21019	0.152636	0.406062	0	93.7347	16.8179	1.06878	75.848	0.170172
128	A65	HempFlax	h	3	0.0973263	0.285684	11.8256	0	0	0.0658282	0	0	0.35689	1.10251	0.0368185	0.0368185	0.0339863	0	0.139981	0.0881506	0.101964	3.65394	0.89773	0.21708	0.321487	0	0.708276	0.397938	0	0	0	0.916705	0.41447	0.635314	0	0.0741724	0	0.183962	194.641	4.31674	2.91797	1.35082	0.627268	0.18177	226.628	13.9814	8.61119	204.035	0.00696111
129	A66	HempFlax	h	3	0.705632	1.23491	2.78176	0.0346105	0.378869	1.50944	0.144578	0.543333	0.118572	2.10821	0.121488	0.347111	0	0	0.358648	0.233231	0.0971745	1.38233	0.444176	0	0.0943753	0	0.247012	0.230401	0	0	0	0.394097	0.272021	0	0	0	0	0.2637	141.691	4.79865	1.47453	0.761712	0.506498	0.172596	163.45	10.3872	3.65852	149.405	0.067933
130	A67	HempFlax	h	3	0.245429	0.523025	6.86608	0	0	0	0	0	0.312614	2.72917	0.184088	0.15486	0	0	0.207452	0.106574	0.126201	2.18478	0.844208	0.0757292	0	0	0.434675	0.280459	0	0	0	0.619788	0.218748	0.221568	0	0	0	0	153.251	2.91525	1.35328	1.13346	0.420784	0.144041	175.554	11.2227	5.11273	159.218	0.021869
131	B1	HempFlax	h	3	0.35968	0.203983	7.55978	0	0	1.42493	0	0	0.0935243	0.104792	0	0	0.0736727	0	0.782031	0	0	0.973539	0.244761	0.0297436	0.0680777	0	0.138668	0.138732	0	0	0	0.252936	0.214794	0.0351516	0	0	0	0	129.892	3.08676	1.41529	0.661634	0.496387	0.143447	148.394	10.6024	2.0964	135.695	0.0339244
132	B2	HempFlax	h	3	0.135581	0.265296	4.88252	0	0	0.0750612	0	0	0.484411	1.23136	0.0894515	0.0663365	0	0	0.126907	0	0	3.29083	1.32338	0.249313	0.152476	0.0746974	0.584008	0.348749	0.0719058	0	0	1.07638	0	0.967269	0	0.146652	0	0.0941421	145.469	1.82977	1.41393	0.710543	0.463851	0.134732	165.758	7.35693	8.3798	150.021	0.018429
133	B3	HempFlax	s	1	0.218301	0.382015	1.92152	0	0.112035	0.84162	0.0317263	0.591806	0.0918927	0.689396	0	0	0	0	0.427997	0.137836	0	0.66996	0.19854	0	0.295052	0	0.162685	0.209523	0	0	0	0.0689181	0	0	0	0	0	0.237117	63.869	1.81118	0.73055	0.469734	0.402589	0.0411638	74.6121	5.30831	1.97963	67.3242	0.0411244
134	B4	HempFlax	h	3	0.410289	0.22621	9.76954	0	0	1.79466	0	0	0.0921352	0.139606	0	0	0.0670373	0	0.63936	0	0	0.82557	0.20908	0.061628	0	0	0.131418	0.152762	0	0	0	0.201102	0.249259	0.115252	0	0	0	0	125.098	4.06438	1.29336	0.662982	0.492737	0.181064	146.877	13.1388	1.94607	131.792	0.0312272
135	B5	HempFlax	h	3	0.167695	0.346682	6.09846	0	0	0.111102	0	0	0.468794	1.65639	0.110819	0.0937897	0	0	0.181997	0	0	2.8206	1.11824	0.199118	0.141906	0.0736076	0.69563	0.308184	0.0301246	0	0	1.11584	0	1.14066	0	0.188155	0	0.0791387	167.669	2.475	1.49728	0.737344	0.531046	0.110542	190.167	9.23574	7.9112	173.02	0.0181572
136	B6	HempFlax	h	3	1.42742	0.872311	8.09221	0	0	0.641465	0	0	0.144944	1.45249	0.105962	0.103145	0	0	0.0864145	0.0270397	0	2.74585	0.912708	0.0989538	0.232731	0.07765	0.157785	0.21943	0	0	0	0.0641301	0.259498	0.43307	0	0.0748367	0	0.390735	131.697	2.2688	1.59959	0.74903	0.506885	0.213571	155.656	12.9264	5.69442	137.035	0.110427
137	B7	HempFlax	h	3	0.23307	0.449493	3.0965	0	0	0.0610422	0	0	0.177577	2.13648	0.199775	0.160929	0	0	0.149831	0	0	2.33843	0.884236	0.0692474	0	0	0.410158	0.229049	0	0	0	0.543326	0.239702	0.223722	0	0	0	0	108.224	1.67761	0.921604	0.705603	0.338401	0.0864004	123.556	6.6647	4.93787	111.953	0.0349709
138	B8	HempFlax	s	1	5.66405	2.14655	6.99214	0	0.0814656	0.898853	0	0.0420281	0.331501	0.969234	0.0702405	0	0	0	0.250071	0.0999	0	0.426123	0.124089	0	0.0997817	0	0.240024	0.118676	0	0	0	0.331619	0	0	0	0	0	0.0997986	98.4517	3.40471	1.1885	0.386465	0.517703	0.0984055	123.034	17.4461	1.54001	104.048	0.32466
139	B9	HempFlax	s	1	2.49784	0.767979	1.42565	0	1.33673	4.6189	0.0389483	0	0.304988	0.282886	0	0	0	0	0.216249	0.0985316	0	0.793129	0.194287	0	0.172966	0	0.111757	0.117098	0	0	0	0	0.141047	0	0	0	0	0.148995	81.6018	7.12921	1.26592	0.481942	0.435161	0.0790968	104.261	11.4902	1.77781	90.9931	0.217389
140	B10	HempFlax	s	1	6.43384	2.38958	6.09713	0	0.0712991	0.789753	0	0	0.312605	0.905207	0.0658367	0	0	0	0.235843	0.0737288	0	0.397482	0.113238	0	0.0789952	0	0.236962	0.102682	0	0	0	0.31851	0	0	0	0	0	0.0921495	89.6446	2.62194	0.985668	0.370002	0.476872	0	112.814	17.3011	1.41375	94.0991	0.371875
141	B11	HempFlax	h	3	0.162553	0.311487	4.831	0	0	0.0633652	0	0	0.435341	1.74189	0.124007	0.0936967	0	0	0.132265	0	0	3.07337	1.21137	0.0398448	0	0.0608446	0.661364	0.29364	0.0661573	0	0	0.983993	0	0.328214	0	0.148232	0	0.0608655	134.603	1.61582	1.28699	0.661305	0.450397	0.114472	153.555	7.89561	6.9279	138.732	0.0205878
142	B13	HempFlax	i	5	1.6445	0.732776	5.73571	0	0	0.59002	0	0	0.302064	1.20265	0.114668	0.0866987	0	0	0.128657	0	0.0698026	1.26973	0.330158	0.147683	0.257704	0	0.324826	0.187911	0	0	0	0.30065	0.236245	0.464441	0.311417	0.346314	0.209417	0.357043	78.8477	1.64024	2.2317	40.1343	0.460835	0	138.666	10.5378	4.81334	123.315	0.156058
143	B14	HempFlax	h	3	1.02215	1.00292	5.554	0	0.220417	1.00835	0.101991	0.289229	0.140525	1.16546	0.0688319	0.146055	0	0	0.214906	0.0925553	0	0.547389	0.166588	0.0687437	0.127039	0	0.155991	0.298824	0	0	0	0.121656	0	0.275012	0.542136	0.452198	0.401976	0.206268	123.039	5.70788	1.14747	1.15853	0.536219	0.17869	146.159	10.9348	3.45638	131.768	0.0934768
144	B15	HempFlax	h	3	0.786392	1.35173	5.40613	0.0710605	0.466964	2.03419	0.185679	0.573756	0.147441	1.78026	0.0791949	0.322123	0	0	0.647204	0.24113	0.0289643	1.28971	0.382749	0.094382	0.0865283	0	0.272614	0.159936	0	0	0	0.26476	0.212348	0.283237	0	0	0	0.0707751	186.094	8.60577	2.12971	1.39598	0.602404	0.38619	216.453	13.8521	3.38713	199.214	0.0567705
145	B16	HempFlax	h	3	0.782287	1.28195	2.29221	0.0591548	0.438165	1.7124	0.209759	0.583273	0.0941042	1.52963	0.072554	0.325351	0	0	0.927085	0.208872	0.0312968	2.15273	0.518328	0.170109	0.126307	0.033131	0.353317	0.324866	0.0824462	0	0	0.407491	0	0.363511	0	0.0798381	0	0.0876623	193.046	10.4567	2.52349	1.00377	0.742516	0.376385	223.396	10.3079	4.93991	208.148	0.0758919
146	B17	HempFlax	h	3	0.694738	1.22324	4.84752	0.0301746	0.392253	1.79736	0.168827	0.643753	0.179762	1.705	0.0953296	0.285951	0	0	0.653818	0.154157	0.0337588	1.27589	0.389614	0.109865	0.0915424	0	0.256195	0.148999	0	0	0	0.256268	0.206638	0.287829	0	0	0	0.0679894	181.148	9.58637	2.03969	1.33618	0.565735	0.360678	211.033	12.7177	3.27875	195.036	0.0546276
147	B18	HempFlax	h	3	0.395122	0.225781	10.2141	0	0	1.81972	0	0	0.107514	0.142455	0	0	0	0	0.835929	0	0	0.717278	0.159964	0	0	0	0.103204	0.123846	0	0	0	0.188351	0.141906	0	0.0722425	0	0	0	141.698	3.87821	1.46126	0.83004	0.596375	0.233656	163.945	13.7406	1.50679	148.697	0.0287559
148	B19	HempFlax	h	3	1.24764	1.16357	7.14984	0	0.257676	1.32365	0.116633	0.0813565	0.170885	1.38059	0.0895052	0.290224	0	0	0.246817	0.166637	0	0.320236	0.0963296	0	0.0572739	0	0.124976	0.213497	0	0	0	0.0963296	0	0.0885032	0.390508	0.296779	0.380129	0.143198	127.162	5.41593	1.21413	0.872759	0.517318	0.126685	151.201	13.5184	2.3744	135.309	0.092292
149	B20	HempFlax	h	3	1.38776	0.524811	6.18618	0	0	0.933537	0	0	0	0.681918	0.0568195	0	0	0	0	0	0	1.3374	0.345375	0.0883466	0.350608	0	0.101284	0.13764	0	0	0	0.0571441	0.218136	0.153221	0.272703	0.280487	0.168829	0.628438	103.551	2.33788	1.57289	4.90103	0.533646	0.112378	126.92	9.77103	4.13961	113.009	0.142028
150	B21	HempFlax	h	3	0.582417	0.397362	12.3322	0	0	1.60312	0	0	0.315709	0.432751	0	0	0.0707561	0	0.215016	0	0	0.454568	0.104494	0.104517	0.091461	0	0.138474	0.117573	0	0	0	0.159375	0.156755	0.232568	0	0	0	0	179.097	7.60291	1.90342	1.41606	0.706296	0.384906	208.62	15.9493	1.55979	191.111	0.0365168
151	B22	HempFlax	h	3	1.14017	0.418063	6.26008	0	0	0.635238	0	0	0.130305	0.146593	0	0	0	0	0.808978	0	0	0.906823	0.260581	0.145925	0.0573279	0	0.218888	0.239735	0	0	0	0.328332	0.16156	0.271004	0	0	0	0	109.231	5.6567	0.915779	0.598779	0.500156	0.147934	129.18	9.53943	2.59018	117.051	0.119522
152	B23	HempFlax	h	3	0.692567	1.18223	1.9262	0.0324641	0.348989	2.01818	0.159615	0.605996	0.159615	2.02359	0.15691	0.354399	0	0.0270534	0.524836	0.168794	0	0.823196	0.181778	0	0.0571303	0	0.233715	0.244102	0	0	0	0.386928	0.189569	0	0	0.0597272	0	0	129.793	11.6675	1.31979	0.508963	0.445782	0.186035	156.478	10.2127	2.34494	143.921	0.0678146
153	B24	HempFlax	h	3	8.07099	1.89003	6.82215	0	0	0.719537	0	0	0.12357	1.34802	0.0886814	0.0725324	0	0	0.123597	0	0	1.20603	0.247464	0	0.105705	0	0.335022	0.14951	0	0	0	0.582433	0.190723	0	0	0.108323	0	0.0670044	144.479	3.95874	1.43565	0.797884	0.494856	0.240384	173.658	19.2591	2.99221	151.406	0.419074
154	B27	HempFlax	h	3	0.866506	0.500863	10.1022	0	0	0.259831	0	0	0.197595	0.782468	0.0269374	0	0.0704294	0	0.555074	0	0	0.995646	0.340636	0.153417	0.189778	0	0.288545	0.179327	0	0	0	0.413304	0	0.621477	0.408106	0.465314	0.244292	0.265059	135.854	2.12508	1.6756	0.72019	0.59022	0.228486	159.12	13.3619	4.5649	141.194	0.0648489
155	B28	HempFlax	h	3	0.833503	1.37215	5.41042	0	0.446558	1.81341	0.192157	0.295156	0.173229	1.92971	0.0893093	0.408632	0	0	0.63875	0.218207	0.06234	1.22109	0.361134	0.0675583	0.0727542	0	0.202652	0.155856	0	0	0	0.24422	0.17408	0.192305	0	0.103919	0	0.0753242	191.37	8.97247	2.13872	1.34851	0.625144	0.31961	221.529	13.603	3.15144	204.775	0.0612735
156	B29	HempFlax	h	3	0.161582	0.342396	5.53461	0	0	0.0327461	0	0	0.465581	1.91995	0.126	0.104105	0	0	0.156125	0	0	3.06047	1.19102	0.0314327	0	0.0815316	0.575856	0.331262	0.089431	0	0	0.880842	0	0.241728	0	0.160361	0	0.0788502	142.548	2.1209	1.27936	0.643079	0.44776	0.0959865	162.701	8.84309	6.72279	147.135	0.0182722
157	B30	HempFlax	h	3	0.749147	1.2668	5.75904	0	0.433177	1.98324	0.160737	0.304978	0.228835	1.74358	0.0653883	0.395078	0.0436615	0	1.19048	0.251063	0.0549166	0.849761	0.269344	0	0.0889052	0	0.248398	0.146441	0	0	0	0.373902	0.169961	0.146405	0	0.117673	0	0.222259	186.781	5.51727	2.11363	1.26895	0.710481	0.402891	214.058	14.3242	2.93903	196.795	0.0522996
158	B31	HempFlax	h	3	4.0782	2.04739	7.14204	0	0	0.394214	0	0	0	2.57055	0.229935	0.180654	0	0.0711905	0.295639	0	0	1.7368	0.478175	0	0.2995	0.118216	0.183895	0.454534	0.0578027	0	0	0.118227	0	0.16283	0.254852	0.349427	0.29167	0.848564	114.687	1.39565	2.4823	0.813295	0.514961	0.0816746	142.339	17.0098	5.35449	119.975	0.239756
159	B32	HempFlax	h	3	3.33295	1.76417	7.58188	0	0	0.366394	0	0	0	2.38349	0.219977	0.1738	0	0.0569893	0.27947	0	0	1.86754	0.552158	0.0651727	0.338736	0.12246	0.197921	0.47955	0	0	0	0.117248	0	0.594034	0.317888	0.419409	0.242291	0.825901	111.607	1.36299	2.4051	0.876887	0.503625	0.116151	139.171	16.1591	6.14031	116.872	0.206258
160	B33	HempFlax	h	3	0.198173	0.361054	4.78329	0	0	0.0624379	0	0	0.412633	1.84328	0.138449	0.105873	0	0	0.160167	0	0	2.96281	1.19867	0.158955	0.0990208	0.0990208	0.588913	0.328332	0.0755685	0	0	0.94591	0	0.779138	0	0.19283	0	0.0990208	138.67	1.84565	1.2997	0.630479	0.461412	0.176111	158.677	8.06535	7.52819	143.083	0.0245709
161	B34	HempFlax	h	3	0.768739	1.36628	5.44646	0.157565	0.445472	1.8498	0.165702	1.96412	0.122248	2.36867	0.138522	0.249842	0	0	0.86108	0.125176	0.0314055	1.11321	0.35461	0.109513	0.117344	0	0.211175	0.174718	0	0	0	0.28415	0.205961	0.458869	0	0.0938918	0	0	180.938	7.0727	1.89249	1.01143	0.623754	0.345497	211.068	15.9045	3.28002	191.884	0.0483347
162	B35	HempFlax	h	3	0.732149	1.24926	4.51816	0.117014	0.413706	1.8481	0.157866	1.47216	0.136092	1.61399	0.0816526	0.217764	0	0	0.634161	0.117578	0.0626976	1.09998	0.326607	0.143686	0.138456	0	0.209025	0.198557	0	0	0	0.287394	0.209007	0.433644	0	0.101907	0	0	175.602	8.92413	2.05183	1.29251	0.582676	0.356691	205.33	13.1921	3.32854	188.809	0.0554991
163	B36	HempFlax	h	3	0.0679992	0.244774	15.787	0	0	0.318165	0	0	0.677155	0.753345	0	0	0.0761338	0	0.0870208	0	0	0.968429	0.373255	0	0.114837	0	0.0678777	0.109643	0	0	0	0	0	0.138298	0	0	0	0.0600422	150.901	4.13909	1.33374	0.688056	0.486959	0.264595	177.658	18.0116	1.83238	157.814	0.0037753
164	B37	HempFlax	i	5	0	0.136376	9.79403	0	0	0.516259	0	0	0	0.398747	0	0	0	0	0	0	0	0.967454	0.267399	0.204416	0.277882	0	0.0550133	0.277839	0	0	0	0	0.4745	0.461548	0	0.141605	0	0.225425	128.765	2.31624	1.67235	0.750807	0.400434	0.205457	148.309	10.8454	3.35308	134.111	0
165	B38	HempFlax	h	3	0.788921	1.30503	2.18095	0.109005	0.442249	1.72503	0.196573	1.59844	0.0846557	1.62152	0.0764047	0.235078	0	0	0.726228	0.165277	0.0364184	1.66159	0.393179	0.233027	0.196183	0	0.262068	0.290837	0.078659	0	0	0.348492	0	0.552169	0	0.125831	0	0.0812216	169.103	9.37581	2.07223	0.786081	0.6764	0.254942	197.784	11.0901	4.42495	182.269	0.0711375
166	B39	HempFlax	hi	4	1.37119	1.26502	6.8072	0.123378	0.283966	1.10162	0.123317	1.97712	0.117625	1.20479	0.0688494	0	0	0	0.717196	0.079849	0	0.245011	0.0991174	0	0.107371	0	0	0.121118	0	0	0	0	0	0.212039	0.234054	0.247815	0.132161	0.195474	143.294	2.94366	1.325	0.796525	0.61046	0.122819	165.927	15.1613	1.67401	149.092	0.0904402
167	B40	HempFlax	hi	4	1.30543	1.27641	7.09252	0.113262	0.284926	1.0935	0.11347	1.7302	0.101789	1.59361	0.0813742	0.119362	0	0	0.721102	0.0672719	0	0.217663	0.0837413	0	0.0976318	0	0	0.131218	0	0	0	0	0	0.237035	0.206476	0.220416	0.12839	0.181398	131.056	2.13518	1.30901	0.618765	0.569646	0.0867039	152.974	15.6269	1.57124	135.776	0.0835369
168	B41	HempFlax	h	3	0	0.200409	14.1233	0	0	0.29763	0	0	0.666249	0.515822	0	0	0	0	0.0707496	0	0	0.642276	0.22635	0.110345	0.118846	0	0.175439	0.121641	0	0	0	0.294239	0.195258	0.413223	0	0.0820718	0	0.0622526	157.668	5.83578	1.23921	1.02111	0.54306	0.0917641	184.715	15.8741	2.44194	166.399	0
169	B42	HempFlax	h	3	0	0.214151	12.9486	0	0	0.756733	0	0	0	0.693917	0	0	0	0	0.0628162	0	0	0.821257	0.21635	0.199865	0.290255	0	0	0.315037	0	0	0	0	0.446419	0.507156	0	0.139568	0	0.249099	161.476	2.78416	1.98491	1.04427	0.544643	0.163079	185.859	14.6762	3.18501	167.997	0
170	B43	HempFlax	h	3	0.804365	1.38614	5.5339	0.142591	0.450659	2.31621	0.216691	1.97949	0.14546	1.8027	0.0713281	0.265264	0.0684919	0	0.724399	0.17242	0.0275365	1.21029	0.369655	0.175268	0.164315	0	0.249149	0.210878	0	0	0	0.328568	0.219014	0.531216	0	0.150578	0	0.087587	195.366	10.0518	2.22817	1.38041	0.636571	0.140722	229.607	15.9077	3.89647	209.803	0.0505646
171	B44	HempFlax	hi	4	0	0.225148	10.6028	0	0	0.744182	0	0	0	0.85121	0	0	0	0	0.0713825	0	0	0.846209	0.226695	0.181902	0.268896	0	0	0.318941	0	0	0	0	0.45078	0.461269	0	0.13443	0	0.203003	143.992	2.75348	1.74957	0.897691	0.481049	0.106889	165.567	12.4947	3.09213	149.981	0
172	B45	HempFlax	hi	4	0	0.264146	12.3923	0	0	0.642649	0	0	0	1.05397	0	0	0	0	0.0952689	0	0	1.01668	0.263968	0.14625	0.216823	0	0	0.263927	0	0	0	0	0.436447	0.384239	0	0.130646	0	0.23251	156.628	2.52594	1.73141	0.950525	0.551315	0.112978	180.04	14.4484	3.09149	162.5	0
173	B46	HempFlax	hi	4	2.05692	1.13441	11.2593	0	0	0.308336	0	0	0.145848	1.50071	0.132139	0.115616	0.0743699	0	0.187292	0	0	0.285435	0.116266	0.0634763	0.0608141	0	0.0713491	0.118928	0	0	0	0	0	0.309433	0.174493	0.208875	0.121628	0.0952334	111.018	1.22505	1.27857	0.721613	0.632369	1.2397	134.656	16.915	1.62593	116.115	0.121604
174	B47	HempFlax	hi	4	1.64398	0.993519	12.0759	0	0	0.170153	0	0	0.137215	1.65217	0.128992	0.0988016	0.0850767	0	0.172901	0	0	0.292416	0.113269	0.0790335	0.0816711	0	0.0816644	0.139611	0	0	0	0	0	0.395194	0.194946	0.229188	0.129081	0.113269	110.91	0.900999	1.23915	0.758492	0.569774	1.32112	134.707	17.1587	1.84934	115.699	0.0958102
175	B48	HempFlax	hi	4	8.87729	3.56982	7.55021	0	0	0.513034	0	0	0.0931991	1.95037	0.1454	0.120723	0.030302	0.030302	0.348258	0	0	0.853255	0.250206	0	0	0	0.136814	0	0	0	0	0.242118	0.144857	0	0	0	0	0	115.523	3.26425	1.89956	4.70523	0.494893	0.0960534	150.839	23.2289	1.62725	125.983	0.382166
176	B49	HempFlax	h	3	1.74742	1.64105	5.16318	0.134739	0.375528	1.93451	0.191809	2.0602	0.102728	2.30914	0.140692	0.29235	0.0267997	0.0327522	0.719045	0.132524	0	1.10555	0.358179	0.142387	0.131908	0	0.210267	0.181449	0	0	0	0.256762	0.21003	0.504668	0	0.111565	0	0	173.256	8.05557	2.00985	1.63193	0.659604	0.168378	205.998	16.8719	3.34529	185.781	0.103569
177	B50	HempFlax	h	3	0.304567	0.642937	6.09523	0	0	0	0	0	0.558324	2.35439	0.259439	0.202989	0.0592501	0.0620083	1.05756	0	0	3.08651	1.3454	0.135366	0.0921286	0	0.503602	0.273499	0	0	0	0.67695	0.397877	0.422302	0	0.230142	0	0	167.508	5.36815	2.29845	1.27316	0.559867	0.105935	195.874	11.5967	7.16377	177.113	0.0262632
178	B51	HempFlax	h	3	1.05283	1.097	7.13974	0.118456	0.237052	0.890348	0.11024	1.58413	0.146086	1.72273	0.143242	0.190182	0	0	0.264402	0.0715116	0	0.251303	0.0819928	0.132273	0.140193	0	0.126882	0.306874	0	0	0	0.0740396	0	0.571119	0.711581	0.703628	0.444405	0.13224	129.574	5.45339	1.22667	0.822577	0.554277	0.790372	156.866	14.6964	3.74804	138.422	0.0716385
179	B52	HempFlax	hi	4	9.61024	3.82139	5.6367	0	0	0.680459	0	0.0716907	0.0575091	2.0776	0.181819	0.143284	0	0.0606388	0.360736	0	0	1.05783	0.290908	0	0	0	0.11366	0	0	0	0	0.198216	0.142857	0	0	0	0	0	126.593	4.03177	1.34736	5.11045	0.56089	0.107229	162.256	22.7021	1.80347	137.75	0.42332
180	B53	HempFlax	hi	4	6.44601	2.81772	6.78237	0	0	0.314305	0	0	0.25365	2.33247	0.192994	0.148881	0	0.0551412	0.121311	0	0	1.0533	0.296406	0	0.280527	0	0.121738	0.116445	0	0	0	0.0529296	0.386386	0	0	0.100566	0	0.381093	100.24	3.17655	2.1964	5.32287	0.407801	0.164551	133.763	19.4649	2.78939	111.508	0.331161
181	B54	HempFlax	h	3	0.701481	1.19859	4.60105	0.12704	0.375596	1.63495	0.171228	1.67913	0.149134	2.22043	0.115993	0.237509	0	0	0.911373	0.159058	0	0.567307	0.206775	0.0901329	0.0954348	0	0.222681	0.111341	0	0	0	0.265097	0.227983	0.392343	0	0.116643	0	0.143152	160.903	4.00609	1.66263	0.988981	0.65932	0.100331	185.042	14.1235	2.59795	168.32	0.0496676
182	B55	HempFlax	h	3	0.702288	1.22074	4.4405	0.172549	0.378629	1.93911	0.172798	2.76693	0.0878171	2.0029	0.128859	0.211253	0	0	0.652739	0.110618	0	0.884588	0.284473	0.163026	0.162847	0	0.192251	0.226083	0	0	0	0.239334	0.228984	0.712499	0	0.121088	0	0.0711631	174.582	8.57367	1.89315	1.14227	0.626144	0.117538	205.208	14.8771	3.39696	186.934	0.0472059
183	B57	HempFlax	hi	4	0	0.0839188	0.643378	0	0	0	0	0	0	0.212594	0	0	0	0	0	0	0	0.692756	0.204068	0.107404	0.134255	0	0	0.080553	0	0	0	0.053702	0.0698126	0.300731	0	0	0	0.0698126	19.2286	0.370199	1.01623	0.54441	0	0	23.8124	0.939891	1.71309	21.1594	0
184	B61	HempFlax	h	3	0	0.244352	7.72303	0	0	0.296509	0	0	0.271816	0.870319	0.0659001	0.0274776	0	0	1.02406	0	0	1.09105	0.376877	0.0711607	0.113335	0	0.263538	0.179229	0	0	0	0.390039	0.258276	0.295198	0	0.142313	0	0.160753	119.744	2.41519	1.20044	0.452406	0.445294	0.324151	138.447	10.5235	3.34177	124.581	0
185	B62	HempFlax	h	3	0.940225	1.59872	3.04377	0.460745	0.539276	3.47276	0.268339	9.19175	0.279154	3.32542	0.21134	0.222155	0	0.0623203	0.788532	0	0	1.63179	0.416441	0	0.0624579	0	0.291359	0.798719	0	0	0	0.556799	0.359139	0	0	0.0572312	0	0.0546417	195.438	23.1465	2.24359	0.819408	0.699822	0.154652	251.135	24.4045	4.22858	222.502	0.0385267
200	S11	Bedrocan	hi	4	0.952809	0.275126	2.40899	0	0	0.312016	0	0	0	0	0	0	0	0	0.204683	0.201932	0	0.358527	0	0	0	0	0	0	0	0	0	0	0	0	0.181046	0.1497	0.173983	0.153198	34.1921	1.47959	0.527486	0.184554	0.145711	0.174828	42.0762	4.15363	1.21839	36.7042	0.229392
201	AZ2	Bedrocan	i	5	0.833259	0.416629	0.948191	0	0	0	0	0	0	0.287331	0	0	0	0	0.229864	0.216126	0	1.40855	0.387537	0.149053	0.186316	0	0.178863	0.231032	0	0	0	0.238484	0.260842	0.618569	0	0	0.163958	0.372632	63.9031	4.0195	1.37217	0.478181	0.311857	0.547483	77.7595	2.71527	4.41196	70.6323	0.306878
202	BB5	Bedrocan	h	3	0	0.190528	0.254011	0	0	0.63142	0	0.274996	0	0.370432	0	0	0	0	0.30679	0.285528	0	1.79351	0.512431	0.0765851	0.172035	0	0.150099	0.34045	0.292794	0	0	0.212315	0	0.245083	0	0	0	0.314922	46.1153	1.29033	5.14993	0.704688	0.153166	0	59.8374	2.02818	4.39575	53.4134	0
203	AP1	Bedrocan	h	3	1.63858	0.474669	3.73415	0	0	0.601265	0	0	0.214502	4.50081	0	0	0	0	0.460605	0.259005	0	0.784359	0.26632	0.156864	0	0	0.277249	0.233494	0.149568	0	0	0.477927	0	0.248076	0	0.0840132	0	0	90.88	3.82337	1.5876	0.66151	0.413887	0	111.928	11.6246	2.93687	97.3664	0.140958
204	BC1	Bedrocan	h	3	0	0.152716	4.97219	0	0	0	0	0	0.207566	0.461832	0	0	0	0	0.713195	0.246916	0.0683499	1.76677	0.386855	0.385843	0.189808	0	0.562183	0.236057	0.165278	0	0	0.909219	0.361313	0.665946	0	0.151405	0.257169	0	122.909	3.75373	1.34864	0.813156	0.458836	0	142.144	6.50749	6.35311	129.283	0
205	BD8	Bedrocan	s	1	0.783035	0.275651	0.94096	0	0	0.161371	0	0	0	0.194983	0	0	0	0	0.319295	0.282483	0	0.432309	0	0	0	0.198861	0.156872	0	0	0	0	0.292891	0	0	0	0	0	0	20.0627	0.262779	1.93199	0.220474	12.5606	0.239931	39.3172	2.67529	1.36342	35.2785	0.292691
206	BA8	Bedrocan	h	3	0.714974	0.355826	5.71765	0	0	0.161229	0	0	0	0	0	0	0	0	0.241916	0.163752	0	0.717506	0.209017	0.181138	0.22288	0	0.149812	0	0	0	0	0	0	0.285151	0	0.068935	0.146289	0.156782	69.2612	1.32166	0.861711	0.398556	0.417928	0.534306	82.2882	7.19159	2.30126	72.7953	0.0994181
207	AZ10	Bedrocan	i	5	3.56207	1.59495	1.07454	0	0	0	0	0	0	0.724868	0	0	0	0	0.360947	0.288805	0	1.11037	0.32334	0	0.173559	0	0	0	0	0	0	0	0.180951	0.514388	0.274682	0.302707	0.232534	0.493534	77.9287	1.51167	1.13282	0.550659	0.411173	0.356538	93.1038	7.31738	3.89487	81.8916	0.486796
208	AY	Bedrocan	h	3	1.16928	0.564291	7.09642	0	0	0.302519	0	0	0.146149	0.968653	0	0	0	0	0.302792	0.183347	0	0.511223	0.204555	0	0.0745592	0	0	0.515104	0.148174	0	0	0	0	0.172979	0.479789	0.434011	0.409205	0.208106	121.688	4.15268	1.16101	0.524511	0.616471	0	142.034	10.5501	3.34105	128.143	0.110831
209	AZ7	Bedrocan	i	5	4.41275	2.28087	5.82085	0	0	0.492241	0	0	0	2.8408	0.271826	0.205071	0	0	0.384543	0.28202	0	4.6306	1.23855	0	0.302849	0	0.446872	0.255239	0	0	0	0.521264	0.468074	1.37216	0.579662	0.61165	0.547673	0.733653	65.7657	1.05003	2.21033	1.34521	0.905107	0.583574	100.559	16.709	11.9903	71.8599	0.264095
210	BC2	Bedrocan	h	3	0.505299	0.856593	2.05366	0	0.272357	0.971261	0.161281	1.02904	0.624944	1.34757	0	0	0	0	0.326107	0.193348	0	1.11925	0.252856	0	0	0	0.301185	0.223127	0	0	0	0.513149	0.226821	0.159909	0	0	0.156182	0	113.879	5.40802	1.61487	0.72609	0.591342	0	133.513	8.14811	3.14582	122.219	0.0620142
211	AP3	Bedrocan	h	3	2.14582	0.740195	3.8004	0	0	0.644098	0	0	0	5.73283	0.274032	0.163708	0	0	0.743765	0.225186	0	1.52117	0.431986	0.347062	0.210449	0	0.845491	0.380304	0.188304	0	0	1.48797	0	0.57596	0	0.225225	0.1994	0.158767	110.204	8.41509	3.03517	0.782796	0.652322	0	144.132	14.2448	6.79728	123.089	0.150638
212	BJ	Bedrocan	i	5	3.41451	1.04922	10.2206	0	0	1.15487	0	0	0.35291	0.252244	0	0	0	0	0.413795	0.261583	0	7.37293	2.17677	0	0.732648	0	0.266877	0.690896	0.214536	0	0	0	0	0	0	0.225004	0	1.30803	129.722	8.37526	5.20066	0.466909	0.578908	0	174.451	16.8581	13.2493	144.344	0.202544
213	AZ9	Bedrocan	i	5	1.21023	0.695677	3.60229	0	0	0.144929	0	0	0	0.674058	0	0	0	0	0.452892	0.28946	0	1.72179	0.454881	0.191744	0.16919	0	0.154133	0.203011	0	0	0	0.161651	0.300748	0.703063	0	0.172959	0.082927	0.191724	86.1897	0.992776	1.84565	0.744601	0.583806	0.216744	102.151	6.78008	4.79728	90.5733	0.178498
214	AV7	Bedrocan	s	1	2.13975	0.948991	0.306713	0	0	0	0	0	0	0	0	0	0	0	0.144333	0	0	1.07443	0.374364	0	0	0	0.460471	0.164722	0	0	0	0.872269	0	0	0	0	0	0	18.8437	0.490857	1.8903	1.54565	0	0	29.2566	3.53978	2.94626	22.7705	0.604485
215	Q	Bedrocan	h	3	1.73275	0.457483	2.38138	0	0	0.900663	0	0	0	0.147691	0	0	0	0	0.201737	0.153248	0	1.04271	0.231727	0	0	0	0.160723	0.272849	0	0	0	0.317681	0	0	0	0	0	0	25.3508	2.92986	4.32367	0.396225	37.8907	0.507442	79.3994	5.8217	2.17893	71.3987	0.297636
216	AE	Bedrocan	h	3	0	0.154592	0.255284	0	0	0.52848	0	0.143787	0	0.17616	0	0	0	0	0.150977	0	0	0.805611	0.193976	0	0	0	0	0	0	0	0	0	0	0.253733	0.358159	0.290985	0.30211	0	27.372	0.770021	2.35858	0.145657	0.177048	0.305266	34.7424	1.40928	2.20457	31.1286	0
217	BD2	Bedrocan	s	1	0	0	3.31718	0	0	0	0	0	0.197635	0	0	0	0	0	0.323398	0.287072	0	0.36164	0	0	0	0	0	0.149137	0	0	0	0.264799	0	0	0	0	0	0	41.7826	0.57892	2.36473	3.05808	0.162936	0	52.8481	3.83821	1.06265	47.9473	0
218	G2	Bedrocan	s	1	0.866556	0.50223	3.77618	0	0	2.04802	0	0.2068	0.256002	0.295356	0	0	0	0	0.576069	0.30647	0	1.53744	0.469941	0	0	0	0.27073	0.255385	0	0	0	0.454672	0.301152	0	0	0	0.229862	0	114.188	9.6851	2.39392	0.641277	0.427424	0	139.688	8.52721	3.82565	127.336	0.101622
219	BB3	Bedrocan	h	3	0	0	0.212026	0	0	0.33147	0	0	0	0.180938	0	0	0	0	0.365964	0.322878	0	0.72157	0.0815422	0	0	0	0.245978	0	0	0	0	0.48132	0	0	0	0	0	0	21.7322	0.810607	3.43973	0	0	0.224025	29.1502	1.0904	1.85329	26.2066	0
220	AW4	Bedrocan	i	5	0.340874	0.666245	5.81541	0	0	0	0	0	0.356358	3.419	0.35637	0.273728	0	0	0.583606	0.273724	0	1.67852	0.428667	0	0.377025	0	0	0.377021	0	0	0	0	0	0.304716	1.03293	0.960627	0.785033	0.898643	66.6453	1.98838	7.41133	0	65.4165	0.377013	160.767	11.8116	7.11691	141.839	0.0288593
221	AG	Bedrocan	h	3	2.07141	1.06095	4.79233	0	0	0.252658	0	0	0.191281	1.36777	0	0	0	0	0.30319	0.165997	0	1.3571	0.516162	0.176843	0.227375	0	0	0.270723	0	0	0	0	0.38978	0.317521	0	0.241777	0.205683	0.277942	104.381	3.17987	1.55599	0.523523	0.512571	0	124.34	10.0396	4.1469	110.153	0.206324
222	AL	Bedrocan	h	3	1.28983	0.766714	4.574	0	0	0	0	0	0.193442	1.2002	0	0	0	0	0.222106	0.0712893	0	1.09267	0.419187	0.200497	0.214829	0	0.211413	0.225707	0.150484	0	0	0.329594	0	0.351018	0.297366	0.354657	0.243641	0.15765	110.894	2.72951	1.46207	0.831244	0.587604	0	129.071	8.24629	4.32	116.504	0.156413
223	BD1	Bedrocan	s	1	0.604465	0.329716	3.63672	0	0	0.679441	0	0	0	0.294757	0	0	0	0	0.34453	0.299454	0	0.749178	0.125339	0	0	0	0	0.304694	0	0	0	0.100271	0	0	0	0	0	0	17.3999	0.314766	2.29858	2.2689	24.6217	0.379852	54.7523	5.88963	1.57893	47.2837	0.102632
224	82	HempFlax	h	3	0.353459	0.47257	1.10171	0	0.160022	0.718176	0	0.442722	0.163757	0.420539	0	0	0	0	0.201017	0	0.0774894	1.11162	0.266296	0.254672	0.277803	0	0.212314	0.389844	0	0	0.401468	0.629193	0	0	0	0	0.165965	0.355061	86.2854	4.40101	2.21832	0.430887	0.409243	0	101.921	4.03397	4.14172	93.7449	0.0876206
225	54	HempFlax	hs	2	1.52946	0.628913	2.82569	0	0.153485	1.2978	0	1.14664	0	0.400443	0	0	0	0	0	0	0	0.601112	0.0962405	0.267834	0.275667	0	0	0	0	0	0.248318	0.411141	0	0	0.333948	0.302816	0.279383	0	79.1755	2.73104	1.15888	0.335657	0.353929	0	94.5539	7.98243	2.81646	83.755	0.191604
226	160	HempFlax	s	1	0.28864	0.4011	1.10207	0	0.153692	0.614749	0	0.442308	0.168682	0.378601	0	0	0	0	0.232422	0	0	0.898371	0.225569	0.295564	0.276121	0	0.178899	0.400572	0	0	0.353911	0.583367	0	0	0	0	0.194447	0.330577	80.1238	4.19159	2.10483	0.336333	0.368883	0	94.6451	3.78227	3.7374	87.1255	0.076314
227	111	HempFlax	s	1	0.200749	0.226714	0.922021	0	0	0.53533	0	0.561395	0	0.24164	0	0	0	0	0	0	0	1.79696	0.424182	0	0.192812	0.177347	0	0.374088	0	0	0.701885	1.18007	0	0	0	0	0	0.532146	63.1043	1.51691	1.34835	0.308354	0.243834	0	74.5891	2.68785	5.37949	66.5217	0.0746875
228	91	HempFlax	hs	2	1.26584	0.679292	2.95786	0	0.163323	1.18022	0	1.0835	0.152227	0.512216	0	0	0	0	0.174474	0	0	1.20549	0.308139	0.311976	0.265755	0	0.207936	0.192615	0	0	0.29654	0.485318	0	0	0	0	0.181046	0	84.1325	3.49929	1.47199	0.34379	0.351007	0	101.422	8.16895	3.45482	89.7985	0.154958
229	B17	HempFlax	h	3	1.6486	0.706003	1.70063	0	0	0	0	0	0	0.394181	0	0	0	0	0.210227	0	0	0.697309	0.229839	0	0	0	0.276602	0.179173	0	0	0.163625	0.284426	0	0	0	0	0	0.190919	60.0236	1.05777	1.4418	0.304277	0.300679	0	69.8097	4.65965	2.02189	63.1282	0.353804
230	89	HempFlax	hs	2	1.05116	0.588937	1.96055	0	0	0.64854	0	0.983959	0	0.443559	0	0	0	0	0.231094	0.174027	0	1.11381	0.278444	0.375102	0.3403	0	0.20497	0.228161	0	0	0.22818	0.355775	0	0	0	0	0.158552	0	73.1244	2.51386	1.44564	0.302094	0.330857	0	87.082	5.9078	3.45732	77.7169	0.177928
231	242	HempFlax	h	3	0.50603	0.260472	1.72293	0	0	0.908001	0	0.401942	0	0.189786	0	0	0	0	0.327472	0	0	0.625392	0.169854	0	0	0	0.351313	0.258664	0	0	0.177576	0.312703	0	0	0	0	0	0	55.7905	1.0124	0.962121	0.768258	0.276447	0.34824	65.3702	4.31663	1.8955	59.158	0.117228
232	113	HempFlax	hs	2	0.504922	0.33286	1.72786	0	0	2.56201	0	0.830252	0.243113	0.374023	0	0	0	0	0.190746	0.201811	0.182389	2.28575	0.582111	0	0	0	0	0.64809	0	0	0.861512	1.62602	0	0	0	0	0	0	30.5887	1.3445	1.22334	0.534108	0.227353	0.292286	47.3638	6.76578	6.38769	34.2103	0.0746287
233	161	HempFlax	s	1	0.287682	0.382452	1.07925	0	0.15527	0.605632	0	0.571693	0.345437	0.378582	0	0	0	0	0.26509	0.180791	0	1.15085	0.271015	0.337697	0.341678	0	0.235736	0.38492	0	0	0.440001	0.718876	0	0.0821594	0	0	0.192494	0.392779	85.8517	3.99814	2.74342	0.383497	0.420101	0	102.197	4.07108	4.72899	93.3969	0.0706648
234	51	HempFlax	hs	2	0.557562	0.16423	1.45162	0	0	0.676043	0	0.370457	0	0.40499	0	0	0	0	0.171914	0	0	1.77481	0.649577	0.174329	0.241587	0	0.360525	0.796188	0	0	0.317045	0.487435	0	0	0	0	0	0	39.0462	0.464127	4.4291	2.85612	0.176891	0	55.5707	3.79682	4.8015	46.9724	0.14685
235	114	HempFlax	hs	2	0.312159	0.154196	0.507742	0	0	0.669497	0	0	0	0	0	0	0	0	0.157951	0.156071	0	1.49439	0.36287	0	0	0	0	0.312141	0	0	0.749164	1.33052	0	0	0	0	0	0	35.2989	1.2662	1.53831	0.449912	0.174143	0.301114	45.2353	1.80155	4.40516	39.0286	0.173273
236	92	HempFlax	hs	2	0.722881	0.206	2.55433	0	0	0.767778	0	0	0	0	0	0	0	0	0.16106	0	0	0.408023	0	0	0	0	0	0.182637	0	0	0.268116	0.419685	0	0	0.225386	0.186526	0.190409	0	61.7474	3.00276	0.979237	0.303526	0.285449	0	72.6112	4.41205	1.88078	66.3184	0.163842
237	B6	HempFlax	h	3	0.55433	1.03061	11.1538	0	0	2.06749	0	0	0	0.161054	0	0	0	0	0.183515	0	0	1.46113	0.376936	0	0	0	0	0.462433	0	0	0.244819	0.396362	0	0	0	0	0.170976	0	116.577	4.26054	1.40207	0.552875	0.567323	0	141.624	15.1508	3.11266	123.36	0.0365875
238	B3	HempFlax	s	1	0.413037	0.5745	0.717226	0	0	0.330459	0	0.845055	0	0.788601	0.165205	0	0	0	0.409295	0.1714	0	1.95169	0.560972	1.00125	0.861011	0	0.856977	0.483113	0	0	0	0	0	0.370082	0	0.206396	0.409036	0.299913	115.001	2.94873	1.257	4.43371	0.623118	0.876496	136.555	4.24338	7.17184	125.14	0.0973369
239	162	HempFlax	s	1	0.283527	0.381816	1.33824	0	0.166332	0.748511	0	0.695592	0.16633	0.457417	0	0	0	0	0.283523	0.251006	0	1.10993	0.262777	0.305924	0.317693	0	0.211787	0.396125	0	0	0.454955	0.753031	0	0	0	0	0.196099	0.41965	86.3781	4.21976	2.59311	0.368361	0.379299	0.375	103.514	4.52129	4.67898	94.3137	0.0627093
240	E1	HempFlax	h	3	0.89705	0.448474	3.39657	0	0	1.41366	0	0.874493	0	0.848091	0	0	0	0	0.308928	0.168128	0	0.973506	0.344022	0	0.207169	0	0.320619	0.562946	0	0	0.254134	0.3987	0	0	0	0	0.172064	0	62.8858	0.788634	4.64969	5.30642	0.290625	0	85.5097	8.18726	3.40129	73.9211	0.109567
241	9	HempFlax	s	1	0.553495	0.242611	1.51579	0	0	0.329706	0	0.325951	0	0.200867	0	0	0	0	0.174412	0	0	2.40744	0.593959	0	0	0	0	0.192716	0	0	0.511363	0.857508	0	0	0	0	0	0	39.7793	1.15208	1.13388	0.255987	0.245097	0	50.4722	3.34283	4.56298	42.5663	0.165577
242	136	HempFlax	s	1	0.311991	0.156009	0.877377	0	0	1.18173	0	0.339253	0	0.156009	0	0	0	0	0.171609	0.158924	0.170903	2.4862	0.607704	0	0	0	0	0.480685	0	0	0.937412	1.76809	0	0	0	0	0	0	45.1179	1.49177	1.84673	0.651558	0.202674	0.299365	59.4139	3.19397	6.60992	49.61	0.0976811
243	239	HempFlax	s	1	0.445635	0.178248	3.42481	0	0	0.910334	0	0	0.0849447	0	0	0	0	0	0.174387	0	0	0.379784	0	0.166634	0	0	0	0.189862	0	0	0.321655	0.577398	0	0	0.255713	0.228594	0.220872	0	82.383	3.7775	1.40686	0.348804	0.383675	0	95.8587	5.21836	2.34051	88.2998	0.0853976
244	135	HempFlax	s	1	0.323523	0.161723	0.599799	0	0	0.998058	0	0.189366	0	0.16961	0	0	0	0	0.177573	0.167775	0.17993	2.27403	0.527319	0	0	0	0.863185	0.429448	0	0	0	1.61587	0	0	0	0	0	0	36.2148	0.980848	1.43736	0.475498	0.167341	0.308011	48.2611	2.61965	6.05755	39.5839	0.123498
245	B12	HempFlax	s	1	0.544189	0.272094	1.93915	0	0	0.337244	0	0	0	0.187783	0	0	0	0	0.172454	0	0	0.747436	0.242519	0	0.170956	0	0	0.210713	0	0	0	0	0.258422	0	0	0	0	0.306131	84.6961	3.26494	1.18322	0.425218	0.336477	0.1516	95.4466	3.45292	1.93618	90.0575	0.157603
246	B19	HempFlax	h	3	0.659169	0.441993	2.65218	0	0	0	0	0	0.152411	0.65535	0	0	0	0	0.228617	0	0	0.814232	0.217378	0	0	0	0.169963	0	0	0	0	0.22136	0	0	0.513872	0.466399	0.308343	0	74.083	1.23513	11.3515	0.617635	0.345553	0	95.1341	4.78972	2.71155	87.6328	0.137622
247	48	HempFlax	hs	2	0.426439	0	0.464917	0	0	0.318911	0	0	0	0	0	0	0	0	0.157509	0.163403	0	0.809105	0.243146	0	0	0	0.255064	0.219217	0	0	0	0.502235	0	0	0	0	0	0	21.3959	0.444639	1.09362	0.159383	0	0	26.6535	1.36778	2.19217	23.0935	0.311775
248	E7	HempFlax	hs	2	0.644184	0.306754	2.38501	0	0	0.943269	0	0.421787	0	0.651853	0	0	0	0	0.260741	0.175028	0	1.64686	0.588731	0.167072	0.175028	0	0.294366	0.62851	0	0	0	0.461438	0.350056	0	0	0	0	0	48.8642	0.510543	3.10026	3.70699	0.207177	0	66.4898	5.6136	4.48709	56.3891	0.114754
249	E6	HempFlax	s	1	0.343492	0.269329	3.84868	0	0	1.10854	0	0.476205	0	0.343492	0	0	0	0	0.202973	0	0	0.813927	0.190321	0	0	0	0.413037	0.255111	0	0	0	0.680297	0	0	0	0	0	0.364445	58.3702	1.11852	2.94506	0.331413	0.289987	0.301285	72.6663	6.59271	2.71714	63.3564	0.0521018
250	E11	HempFlax	s	1	0.280958	0.410047	1.57185	0	0.159463	1.07068	0	0.835281	0.182243	0.577103	0	0	0	0	0.273365	0.236328	0	0.968947	0.212696	0.19694	0.259961	0	0.417514	0.354493	0	0	0	0.772006	0.181185	0	0	0	0	0.393881	81.2649	3.44343	2.06606	0.388301	0.293058	0	96.8106	5.36099	3.99395	87.4557	0.0524079
251	B24	HempFlax	h	3	0	0.243648	2.2614	0	0	0	0	0	0.365477	0.582479	0	0	0	0	0.217002	0	0	1.2125	0.43841	0	0	0	0.276463	0.165883	0	0	0	0.347565	0	0	0	0	0	0	96.1369	1.16812	0.859541	0.506877	0.341609	0	105.124	3.67	2.44082	99.013	0
252	E5	HempFlax	s	1	0.313459	0.24163	2.86784	0	0	0.861423	0	0.430551	0	0.230488	0	0	0	0	0.177406	0	0	0.779521	0.16843	0	0.16065	0	0.411377	0.219386	0	0	0	0.658158	0	0	0	0	0	0.387816	56.4922	1.18773	2.73201	0.313393	0.258663	0.251479	69.1436	5.12279	2.78534	61.2355	0.0611892
253	B8	HempFlax	s	1	0	0.161871	1.50253	0	0	0	0	0	0	0.346536	0	0	0	0	0.286194	0	0	1.03898	0.265603	0.300624	0.277188	0	0.179672	0.175793	0	0	0	0.195349	0.269482	0	0	0	0	0	48.4785	1.69546	1.13348	0.552013	0.417581	0	57.2769	2.29713	2.70269	52.2771	0
254	D15	HempFlax	h	3	0.903908	0.641365	5.98559	0	0	0.356377	0	0	0.10927	1.07659	0.16494	0	0	0	0.303545	0.17107	0	1.49352	0.466765	0.35021	0.435494	0.155518	0.159427	0.517204	0	0	0	0.206209	0.295611	0.887084	0	0	0	0.671884	81.4014	1.98427	3.3188	0.611267	0.419409	1.34184	104.429	9.54158	5.81	89.0769	0.0947335
255	E3	HempFlax	hs	2	0.85305	0.451003	3.25763	0	0	1.5294	0	0.909366	0	0.90198	0	0	0	0	0.311994	0.191087	0	1.01788	0.34318	0.163805	0.249593	0	0.284674	0.596631	0	0	0	0.417228	0.327582	0	0	0	0	0.16769	63.4614	0.729244	5.1792	5.23715	0.253915	0	86.8346	8.21442	3.75935	74.8609	0.103848
256	D11	HempFlax	h	3	0.48991	0.305136	5.52266	0	0	0.951509	0	0	0.225781	0.466545	0	0	0	0	0.286137	0	0	0.370915	0	0	0	0	0.16012	0	0	0	0	0.199098	0	0.156234	0.222653	0.226579	0	0.16016	87.1943	7.3514	1.33663	0.63907	0.403159	0.431995	107.1	8.24768	1.49576	97.3566	0.0593997
257	D7	HempFlax	h	3	0	0.259486	7.04045	0	0	0.341709	0	0.153735	0.270891	0.774998	0	0	0	0	0.477613	0	0	0.765076	0.234279	0.167802	0.195147	0	0.109569	0.198968	0	0	0	0.133048	0.105029	0.249839	0.226081	0.241757	0.0816888	0	116.999	3.44117	1.54887	0.696642	0.468053	0	135.181	9.31888	2.70828	123.154	0
258	E8	HempFlax	hs	2	1.47153	0.659911	2.35141	0	0.159289	1.19846	0	0.796444	0	0.42477	0	0	0	0	0.227555	0.180987	0	0.660998	0.15738	0.228202	0.220333	0	0.346237	0.165249	0	0	0	0.542962	0	0	0.283285	0.267547	0.173118	0	73.7891	2.38581	1.48564	0.32933	0.32933	0	88.8349	7.28936	3.2263	78.3192	0.201873
259	D9	HempFlax	h	3	0.0753993	0.308285	6.38022	0	0	0	0	0	0.353889	1.20631	0	0	0	0	0.845102	0.169764	0	0.686423	0.303874	0	0	0	0.240844	0.165853	0	0	0	0.387065	0.181573	0.252425	0	0	0	0.280181	105.391	0.792996	1.21531	0.48457	0.532278	0.260718	120.514	9.16921	2.668	108.677	0.0082231
260	D5	HempFlax	h	3	1.74754	0.97724	5.59518	0	0	0.260597	0	0	0	1.03472	0.160957	0.168622	0	0	0.268262	0	0	1.21657	0.341912	0.170956	0.206737	0	0	0.190835	0	0	0	0	0.246495	0.477087	0	0	0	0.345888	87.7428	1.26826	1.78592	0.757998	0.454799	0.443706	105.863	10.2131	3.19648	92.4535	0.171107
261	E9	HempFlax	h	3	0.558338	0.25242	5.88226	0	0	1.15827	0	0	0.214029	0	0	0	0	0	0.191161	0	0	0.761403	0.182446	0.234077	0.198393	0	0.218209	0.206327	0	0	0	0.309432	0.222195	0	0	0	0	0	98.5683	26.3098	2.04457	0.505517	0.387343	0	138.404	8.25648	2.33248	127.816	0.0676243
262	D8	HempFlax	h	3	0.347091	0.2679	5.52679	0	0	0.663582	0	0	0.226316	0.535485	0	0	0	0	0.241458	0	0	0.532124	0	0	0	0	0.254479	0.172232	0	0	0	0.418927	0	0.226954	0.207541	0.215325	0	0	78.9767	4.44369	1.4712	1.87826	0.382159	0	96.9882	7.80863	2.02758	87.152	0.0444496
263	E4	HempFlax	h	3	1.83398	0.756942	2.74909	0	0.150635	1.44986	0	0.734347	0.169465	0.497096	0	0	0	0	0.252314	0.253942	0	0.793081	0.214874	0.218781	0.257849	0	0.363333	0.167993	0	0	0	0.613368	0	0.164086	0.312544	0.289103	0.210967	0	85.5133	4.15304	1.68229	0.414214	0.385146	0	104.602	8.59374	3.85992	92.148	0.213409
264	E10	HempFlax	hs	2	1.34235	0.671036	3.1623	0	0.180851	1.38342	0	1.61323	0.158298	0.516339	0	0	0	0	0.229925	0.199742	0	0.920159	0.214971	0.271491	0.301674	0	0.339303	0.214879	0	0	0	0.527722	0.19605	0	0	0	0	0	80.8035	2.86875	1.99382	0.373208	0.324196	0	98.8072	9.25775	3.18599	86.3635	0.144997
265	158	HempFlax	s	1	0.3667	0.449915	2.24587	0	0.215479	1.20227	0	1.69014	0.204169	0.661583	0	0	0	0	0.30243	0.279761	0	1.40251	0.332709	0.491503	0.544476	0	0.46881	0.525519	0	0	0	0.801531	0.287347	0.154995	0	0	0	0.431032	101.555	5.30123	2.71835	0.434782	0.434745	0	123.503	7.33856	5.72019	110.444	0.049969
266	D17	HempFlax	h	3	1.48361	1.05612	6.83409	0	0.0926909	0.321799	0	0.940268	0.239878	1.59549	0.17726	0.155103	0	0	0.749266	0.169904	0	0.549819	0.191944	0.203125	0.225224	0	0	0.217809	0	0	0	0.151395	0.221487	0.520364	0.332216	0.380092	0.188207	0.1993	105.343	3.29029	1.74312	0.908312	0.561118	0.668287	129.711	13.6456	3.55089	112.514	0.108725
267	E2	HempFlax	h	3	0.817915	0.681031	2.95149	0	0.194588	1.0953	0	1.57089	0.151297	0.558614	0	0	0	0	0.497209	0.230562	0	1.06266	0.338595	0.554745	0.446628	0	0.389036	0.277358	0	0	0	0.590718	0.417888	0.378269	0	0	0	0	89.047	2.26233	1.59237	0.738594	0.428739	0	107.274	8.51834	4.68646	94.069	0.0960182
268	B39	HempFlax	h	3	0.454545	0.197947	5.1405	0	0	1.14166	0	0	0.176297	0	0	0	0	0	0.311326	0	0	0.410385	0	0.230509	0.208514	0	0.161462	0.348154	0	0	0	0.293599	0	0	0.16129	0.175953	0	0	81.6884	4.58486	1.04567	0.589574	0.403226	0	97.7239	7.42228	1.98987	88.3117	0.0612407
269	D27	HempFlax	h	3	0.296609	0.529409	1.97117	0	0	0.446429	0	0.817995	0.42446	1.58468	0.184057	0.168991	0	0	0.353002	0.180232	0	1.4607	0.514436	0.409208	0.604646	0.153972	0.326834	0.480666	0	0	0	0.379169	0	0.878679	0.251738	0.360605	0.153972	0.304259	106.233	4.52927	1.68977	0.585895	0.48048	0	126.755	6.77681	6.45912	113.519	0.0437682
270	D3	HempFlax	h	3	0.930399	0.717069	3.27842	0	0	0.34279	0	0.899762	0	0.824303	0	0	0	0	0.257923	0	0	0.512095	0.161945	0	0.165696	0	0	0.184028	0	0	0	0.209578	0.173199	0.268325	0.158193	0.176382	0	0.165412	92.2287	1.23206	1.59637	0.820267	0.411654	0.521786	106.236	7.25066	2.17485	96.8109	0.128319
271	D20	HempFlax	h	3	0.641154	0.346499	5.40499	0	0	0.856633	0	0	0.160352	0.323603	0	0	0	0	0.398215	0	0	0.443879	0.17907	0	0	0	0	0.328166	0	0	0	0	0	0	0	0	0	0.156814	103.081	6.86283	1.62783	0.843375	0.417445	0	122.072	8.13145	1.10793	112.832	0.0788487
272	D21	HempFlax	h	3	0.943305	0.449428	5.2041	0	0	0.426364	0	0	0.0886994	0.556804	0	0	0	0	0.689063	0.172281	0	1.31601	0.337368	0.4619	0.417154	0	0.32298	0.326083	0	0	0	0.548485	0.310706	0.596926	0	0.17238	0	0	108.835	2.11654	1.99656	0.785214	0.50196	0.972377	128.547	8.35776	4.98227	115.207	0.112866
273	D2	HempFlax	h	3	0.672329	0.435848	10.4518	0	0	1.304	0	0	0.25864	0.461548	0	0	0	0	0.203091	0	0	0.276953	0	0	0.184777	0	0	0.225432	0	0	0	0	0	0.166221	0	0	0	0	130.645	6.83988	1.55483	1.06026	0.624228	0	155.365	13.7873	0.853383	140.724	0.0487645
274	D29	HempFlax	h	3	0.379282	0.681225	2.57885	0	0.18784	0.644568	0	0.423461	0.305174	1.99806	0.154626	0.257658	0	0	0.654791	0.33242	0	2.34337	0.61071	0	0.183329	0	0	0.210201	0	0	0.355282	0.408807	0	0.259715	0.431504	0.435295	0.336102	0.179372	100.092	3.24101	1.25704	0.568134	0.472406	2.09237	122.074	8.26554	6.08611	107.723	0.0458872
275	B38	HempFlax	h	3	1.25955	0.975115	4.87934	0	0.169909	0.916048	0	0.731332	0.313922	1.1672	0.147747	0.180949	0	0	0.531873	0.268216	0	0.55944	0	0.153276	0.180074	0	0	0.367896	0	0	0.38703	0.559474	0	0	0	0	0	0	99.9677	2.63382	1.27233	0.630798	0.431195	0	118.684	11.273	2.47541	104.936	0.111732
276	D6	HempFlax	h	3	1.23919	0.801392	3.37253	0	0	0	0	0	0.382145	1.44696	0.196638	0.159536	0	0	0.322783	0.1886	0	1.15085	0.442633	0.169355	0.22709	0	0	0.242486	0	0	0.450331	0.500368	0	0.34256	0.369502	0.3772	0.22709	0.173204	114.12	3.38638	1.88291	0.658661	0.422402	0	133.253	7.92117	4.86127	120.471	0.15644
277	D30	HempFlax	h	3	0.177833	0.303784	1.18561	0	0	0.800171	0	0.177814	0.263057	0.737276	0.163025	0.148199	0	0	0.288976	0.18066	0	1.20689	0.368988	0.157592	0.307471	0	0	0.276741	0	0	0.238298	0	0	0.338252	0.307484	0.349773	0.199856	0.365128	74.1295	3.78918	1.23678	0.532633	0.328848	0.736298	89.2962	4.24575	4.29713	80.7533	0.0418849
278	D16	HempFlax	h	3	0	0.153637	8.38946	0	0	0.667024	0	0	0	0.157424	0	0	0	0	0.340666	0.159465	0	1.06857	0.272033	0	0	0	0	0.171012	0	0	0.244932	0.373053	0	0	0.310444	0.252315	0.190178	0.159387	126.695	5.07627	1.23636	1.77132	0.571167	0	148.259	9.70821	3.20139	135.35	0
279	D12	HempFlax	h	3	0.230812	0.402026	3.71471	0	0.16009	1.60803	0	0.569301	0.163804	0.602954	0	0.163823	0	0	0.268086	0.320582	0	0.818921	0.278118	0	0	0.1661	0.197004	0.2665	0	0	0	0.173807	0	0	0	0	0	0	32.5049	1.06725	5.06559	0.524521	54.7826	1.09929	105.149	7.88364	2.22103	95.0441	0.0292773
280	167	HempFlax	s	1	0.265644	0.351698	0.901694	0	0	0.576186	0	0.377888	0.1534	0.40782	0	0	0	0	0.261903	0.217363	0	1.08681	0.256177	0.26394	0.225126	0	0.217363	0.326044	0	0	0.36874	0.535643	0	0	0	0	0	0.318281	76.7284	3.81205	2.23092	0.296012	0.505386	0	90.6844	3.29623	3.81549	83.5727	0.0805902
281	18	HempFlax	i	5	0.323829	0.435596	0.964449	0	0.171272	0.633058	0	0.394895	0.186104	0.361201	0	0	0	0	0.268091	0.239473	0	1.25513	0.301264	0.262614	0.258798	0	0.223964	0.335977	0	0	0.436479	0.687492	0	0	0	0	0	0.393952	95.6907	5.15489	2.48561	0.420137	0.413038	0	112.298	3.73849	4.39514	104.164	0.08662
282	163	HempFlax	s	1	0.369298	0.43882	1.66699	0	0.179308	0.81155	0	0.5018	0.168175	0.460829	0	0	0	0	0.248637	0.29575	0	1.26278	0.284467	0.227854	0.231615	0	0.219932	0.352763	0	0	0.462763	0.743469	0	0	0	0	0	0.398294	99.3129	4.32371	2.80415	0.458677	0.359747	0	116.584	4.84541	4.47969	107.259	0.0762161
283	112	HempFlax	h	3	0.225757	0.259062	1.03998	0	0	0.621785	0	0.481136	0.16654	0.247971	0	0	0	0	0.188747	0.199654	0	1.35149	0.299473	0	0.165095	0	0	0.314835	0	0	0.618144	1.01361	0	0	0	0	0	0.341709	62.7523	1.98181	1.15691	0.207103	0.260661	0	73.8938	3.23098	4.30401	66.3588	0.0698727
284	93	HempFlax	hs	2	1.73204	0.715172	2.49571	0	0	1.2106	0	0.514	0.152711	0.491681	0	0	0	0	0.249553	0.255042	0	0.680061	0.162287	0.177748	0.162287	0	0	0	0	0	0.29367	0.413446	0	0	0.278209	0.266611	0.20479	0	87.9232	23.6035	1.39793	0.316239	0.366567	0	124.063	7.56147	2.89415	113.607	0.229061
285	23	HempFlax	s	1	0.70104	0.367209	2.13272	0	0	0.419123	0	0.17809	0	0.296758	0	0	0	0	0.196655	0.169358	0	1.83957	0.415637	0	0	0	0	0.165524	0	0	0.434897	0.789069	0	0	0	0	0	0	48.0568	1.9152	1.4963	0.243366	0.211134	0	60.0285	4.29159	3.81406	51.9228	0.163352
286	B32	HempFlax	h	3	0.324406	0	2.9495	0	0	0.824061	0	0	0.220013	0	0	0	0	0	0.607751	0.189545	0	0.704003	0.177913	0.162474	0	0	0.166351	0.251422	0	0	0.317229	0.491282	0	0	0	0	0	0	77.4773	7.62078	0.94268	0.500114	0.3346	0	94.2614	4.92573	2.46022	86.8755	0.0658594
287	97	HempFlax	hs	2	0.411701	0.265545	1.17491	0	0	1.42948	0	0.205762	0.164727	0.243259	0	0	0	0	0.205939	0.248631	0	1.47539	0.294993	0	0	0	0	0.399889	0	0	0.78834	1.41337	0	0	0	0	0	0	49.7694	2.14778	1.38724	0.59592	0.158878	0.278335	63.0595	4.10132	4.62062	54.3376	0.100382
288	13	HempFlax	s	1	0.296061	0.171746	1.63852	0	0	0.430592	0	0.149714	0	0.208162	0	0	0	0	0.168036	0.193332	0	0.671066	0.159047	0	0	0	0	0.178173	0	0	0.329522	0.485195	0	0	0	0	0	0.302935	50.1618	1.10928	2.25348	0.264393	0.261034	0.214719	59.6468	3.06283	2.31927	54.2647	0.0966626
289	B22	HempFlax	h	3	0.5439	0.232566	5.23273	0	0	1.15532	0	0	0	0	0	0	0	0	0.168792	0.16733	0	0.51366	0	0	0	0	0	0.225697	0	0	0.159546	0.256826	0	0	0	0	0	0.182891	93.8175	7.19103	1.51277	0.58629	0.361908	0	112.309	7.33331	1.50595	103.469	0.0741684
290	13	HempFlax	s	1	0.257812	0.217852	1.64621	0	0	0.432154	0	0	0	0.170641	0	0	0	0	0.181137	0.180551	0	0.6092	0	0	0	0	0	0.180551	0	0	0.293395	0.417129	0	0	0	0	0	0.270668	46.7007	1.26002	2.31503	0.248452	0.213469	0.205885	55.8009	2.90581	1.95149	50.9436	0.0887229
291	94	HempFlax	hs	2	2.12168	0.765748	3.13015	0	0.156877	1.62481	0	0.369758	0.16808	0.530406	0	0	0	0	0.272669	0.325486	0	0.774987	0.186001	0.166624	0.158874	0	0	0.158874	0	0	0.302245	0.441742	0	0	0.30999	0.278991	0.213124	0	102.865	4.89028	1.6073	0.425262	0.410835	0.144153	122.8	9.14017	3.31694	110.343	0.232127
292	63	HempFlax	hs	2	0.24684	0	1.05857	0	0	0.695856	0	0	0	0.186992	0	0	0	0	0.179543	0.17074	0	1.58709	0.430714	0	0	0	0	0.30261	0	0	0.232794	0.302642	0	0	0	0	0	0.17074	30.2807	1.07513	1.02129	0	0	0	37.9422	2.3678	3.19733	32.3771	0.104249
293	98	HempFlax	hs	2	0.63621	0.160878	1.39318	0	0	0.340052	0	0	0	0	0	0	0	0	0.157207	0.166888	0	0.250352	0	0	0	0	0	0.155514	0	0	0.193454	0.269333	0	0	0.159312	0.155504	0	0	46.9032	1.67572	0.652635	0.204616	0.176395	0	53.6504	2.68752	1.35036	49.6126	0.236727
294	80	HempFlax	hs	2	0.329376	0.399887	0.871037	0	0.170322	0.541125	0	0.148106	0.185133	0.370695	0	0	0	0	0.262621	0.284139	0	1.11373	0.261203	0.161331	0.165228	0	0.161331	0.318765	0	0	0.391693	0.556921	0	0	0	0	0	0.334241	90.4666	4.45718	2.30719	0.400115	0.34689	0	105.005	3.2783	3.74858	97.978	0.100472
295	B10	HempFlax	s	1	1.12844	0.569719	3.72606	0	0	0.189068	0	0	0.246597	0.46068	0	0	0	0	0.380651	0.154119	0	0.237142	0	0	0	0	0	0	0	0	0	0	0	0	0.194862	0.176436	0.165277	0	93.4252	0.769758	1.13798	0.660697	0.35665	0	103.979	6.70121	0.927837	96.3502	0.168393
296	46	HempFlax	h	3	1.06299	0.345988	5.22926	0	0	1.72661	0	0	0.229385	0.156416	0	0	0	0	0.200049	0.154596	0	0.987806	0.199863	0	0	0	0	0.324282	0	0	0.550102	1.04023	0	0	0	0	0	0	77.145	5.58267	2.14635	0.344524	0.298738	0	97.7249	8.95069	3.25688	85.5173	0.11876
297	B40	HempFlax	h	3	0.272874	0.50486	3.96193	0	0.0931175	0.212308	0	0.145263	0	1.22926	0.153557	0.0931175	0	0	0.400737	0.217352	0	0.897112	0.236847	0.159303	0	0	0.10942	0.205891	0	0	0.186658	0.260601	0	0	0.158427	0.23272	0.205891	0.0850097	110.855	2.14888	1.10962	0.774146	0.401265	0	125.312	7.06702	2.95523	115.289	0.0386123
298	B26	HempFlax	h	3	0.834329	0.534705	0.557432	0	0	0.163053	0	0	0	0.402081	0	0	0	0	0.257856	0.208465	0	0.656813	0.283214	0.2478	0.169154	0	0	0.157341	0	0	0.169105	0.192681	0	0	0	0	0	0.176972	71.9445	1.76631	1.08621	0.376795	0.321863	0	80.5067	2.74946	2.26155	75.4957	0.303452
299	159	HempFlax	s	1	0.25985	0.338932	0.956549	0	0.165699	0.587486	0	0.158165	0.195828	0.369067	0	0	0	0	0.263613	0.246129	0	1.17596	0.277388	0.167987	0.187527	0	0.167992	0.343795	0	0	0.378961	0.578205	0	0	0	0	0	0.32426	82.3416	5.1995	1.98386	0.35245	0.323379	0	97.3441	3.29519	3.8482	90.2008	0.0788575
300	67 S1 115	HempFlax	hs	2	0.334866	0.487417	1.74884	0	0.226995	0.982358	0	0.446582	0.148822	0.483738	0	0	0	0	0.461381	0.281755	0	1.44375	0.355134	0.262499	0.158242	0	0.231586	0.281789	0	0	0.28564	0.474778	0	0	0	0.158242	0	0	101.971	10.7667	2.1541	0.718039	0.445157	0	125.31	5.321	3.93341	116.055	0.0629329
301	B25	HempFlax	h	3	0.172312	0.288406	3.95893	0	0	0	0	0	0	1.22488	0.161104	0.149837	0	0	0.711783	0.15936	0	1.62145	0.649314	0.419943	0.202322	0.186716	0.260399	0	0	0	0.318659	0.411925	0	0.237389	0	0.20991	0	0	118.103	1.53663	1.32632	0.589141	0.542128	0.719081	134.161	6.66726	4.67739	122.816	0.0258445
302	B31	HempFlax	h	3	0.223532	0.362711	2.31575	0	0.212494	1.01123	0	0.370312	0.32245	0.59351	0.146568	0.164844	0	0	1.01865	0.228016	0	0.498083	0	0.178741	0.231959	0	0	0.319248	0	0	0.345936	0.486632	0	0	0	0	0	0.224199	77.3925	3.88906	1.60165	1.02863	0.406375	0	93.5731	6.74205	2.51281	84.3182	0.0331549
303	90	HempFlax	hs	2	0.940319	0.46824	1.93306	0	0.154809	0.811772	0	0.490738	0.15102	0.336033	0	0	0	0	0.249183	0.211506	0	1.15162	0.266368	0.250701	0.191936	0	0.176269	0.168408	0	0	0.262438	0.376038	0	0	0	0	0	0	71.0914	2.46627	1.3879	0.24415	0.30604	0	84.0862	5.53517	3.05528	75.4958	0.169881
304	117	HempFlax	s	1	0.333021	0.211894	1.82094	0	0	1.66932	0	0.177805	0.19656	0.234621	0	0	0	0	0.200428	0.176611	0	2.41727	0.608161	0	0	0	0	0.52575	0	0	0.804301	1.491	0	0	0	0	0	0	54.3838	1.6782	1.27705	0.452408	0.207942	0.317545	69.1847	4.84459	6.0231	58.317	0.0687409
305	78	HempFlax	hs	2	0.338315	0.501776	1.46725	0	0.186256	0.684202	0	0.437094	0.18626	0.463754	0	0	0	0	0.319315	0.228725	0	0.903077	0.209009	0.216883	0.201113	0	0.185343	0.358862	0	0	0.394361	0.611254	0	0	0	0	0	0.347038	100.109	4.9257	2.70309	0.385109	0.348437	0	116.711	4.58423	3.65567	108.471	0.0737998
306	B37	HempFlax	h	3	0.782103	0.190723	2.05978	0	0	0.190657	0	0	0	0.217405	0	0	0	0	0.186915	0.162238	0	1.00486	0.280845	0.205802	0.20181	0	0	0.217598	0	0	0.162238	0.197846	0	0	0	0	0	0	25.3639	0.934802	2.89997	2.14927	23.6244	0.345874	61.379	3.62759	2.43324	55.3182	0.215599
307	165	HempFlax	s	1	0.311938	0.448947	1.80351	0	0.175007	0.833369	0	0.418322	0.182653	0.513668	0	0	0	0	0.300507	0.221015	0	1.18408	0.292083	0.232873	0.240765	0	0.197339	0.35526	0	0	0.445915	0.71833	0	0	0	0	0	0.394679	92.2037	4.42246	2.66897	0.392885	0.488567	0	109.447	4.98792	4.28234	100.177	0.0625386
308	B7	HempFlax	h	3	0.604787	0.219206	4.77386	0	0	1.31926	0	0	0	0.15496	0	0	0	0	0.192758	0.164691	0	0.776336	0.203881	0	0	0	0.160759	0	0	0	0.172556	0.219611	0	0	0.188219	0.196039	0	0	82.8181	5.86827	1.47728	0.587135	0.455848	0	100.554	7.26483	2.08209	91.2066	0.0832486
309	B29	HempFlax	h	3	0.415706	0.253115	3.97886	0	0	0.57427	0	0	0.196517	0.29474	0	0	0	0	0.215375	0.168553	0	0.470414	0.164645	0	0	0	0.219453	0.211686	0	0	0.235183	0.372472	0	0	0	0	0	0	91.0087	3.52988	1.75745	0.681783	0.441021	0	105.19	5.92858	1.84241	97.4189	0.070119
310	10	HempFlax	s	1	0.641722	0.303827	1.27225	0	0	0.265765	0	0	0	0.242953	0	0	0	0	0.197479	0.177247	0	1.56732	0.350445	0	0	0	0	0.177247	0	0	0.389899	0.65384	0	0	0	0	0	0	42.537	1.32262	1.22725	0.238029	0.249063	0	51.8139	2.924	3.316	45.5739	0.219467
311	B36	HempFlax	h	3	0.559344	0.283495	4.38509	0	0	0.797631	0	0	0	0.166311	0	0	0	0	0.181408	0.160781	0	0.392123	0.156849	0.160781	0.160759	0	0	0.164691	0	0	0.160759	0.156849	0	0	0.188197	0.176466	0.250914	0	92.5029	3.17649	1.31275	0.587177	0.401114	0	106.483	6.37328	2.12917	97.9805	0.0877639
312	114	HempFlax	hs	2	0.377026	0.243769	0.822492	0	0	1.31381	0	0.152323	0.167555	0.232266	0	0	0	0	0.20947	0.229242	0.165924	2.01534	0.446497	0	0	0	0	0.466168	0	0	0.798288	1.49746	0	0	0	0	0	0	45.894	1.74571	1.30831	0.485091	0.154315	0.26834	58.9934	3.51871	5.61891	49.8558	0.107149
313	Silver haze	TRIMBOS Institute	s	1	0.37554	0.509664	0.456033	0	0.16095	0.295074	0	0.24908	0.272068	0.440704	0	0	0	0	0.329555	0.246472	0	3.36323	1.14889	0.325995	0.222638	0	0.361776	0.25841	0	0.166973	0.246482	0.337919	0	0	0	0.206723	0.274307	0	132.027	12.3934	1.86715	0.883666	0.536117	0	157.956	3.08867	7.15982	147.707	0.121586
314	Vanilla kush	TRIMBOS Institute	i	5	0.436352	0.528198	0.401894	0	0	0.195184	0	0	0.574129	2.39209	0.382729	0.256426	0	0	0.516723	0.226258	0	2.1006	0.59167	0.365339	0.591688	0	0.218407	0.381223	0	0	0.242233	0.293882	0	0.162797	0	0.174737	0.210447	0.532153	144.631	7.76253	1.5031	0.291708	0.635221	0.18832	166.787	5.68373	6.09144	155.012	0.0767721
315	Purple haze	TRIMBOS Institute	i	5	0.403596	0.20751	0.288249	0	0.388159	0.626523	0	0	0.161459	0.196067	0	0	0	0	0.196027	0.187431	0	0.729647	0.235267	0.183411	0	0	0	0	0	0	0	0	0	0	0	0	0	0	62.8322	6.92466	2.84444	0.174355	0.552564	2.18821	79.3198	2.46759	1.33576	75.5164	0.163559
316	Arjan's ultrahaze	TRIMBOS Institute	s	1	0.163444	0.17896	0.311296	0	0	0.303413	0	0.182839	0.163444	0.182814	0	0	0	0	0.249082	0.181658	0	1.35235	0.310821	0.30272	0.205855	0	0.314845	0.234128	0	0	0.403662	0.698334	0	0	0	0	0.17361	0	70.0344	2.82718	1.96366	0.36803	0.462151	0	81.5687	1.73529	4.17798	75.6554	0.0941881
317	Mary cristal	TRIMBOS Institute	i	5	0.283737	0.178779	0.750008	0	0	0	0	0	0.174903	0.213711	0	0	0	0	0.264251	0.177426	0	0.745836	0.262053	0.294334	0.27016	0	0	0	0	0	0.213664	0.274161	0	0.169361	0.371002	0.370939	0.314485	0.221729	105.942	2.78587	1.26379	0.528679	0.536278	0	116.607	1.86539	3.68515	111.056	0.152106
318	Wizard's herb	TRIMBOS Institute	i	5	0.157822	0.173174	0.45403	0	0	0	0	0	0.296336	0.446375	0.211705	0.173174	0	0	0.365656	0.171669	0	2.62335	1.00623	1.1378	0.910054	0	0	0.18764	0.175596	0.37131	0.30341	0.359266	0	0	0	0.295468	0.375369	0.239437	132.986	5.57078	2.36585	0.846789	0.601824	0.15974	152.966	2.27827	8.1566	142.531	0.0692725
319	New york Diesel	TRIMBOS Institute	s	1	2.30318	1.02965	0.35222	0	0	0.162587	0	0	0.216742	0.526451	0.178031	0.178051	0	0	0.352261	0.180708	0	1.11241	0.353384	0.313246	0.261027	0	0	0	0	0	0	0	0	0.192767	0	0	0	0.257022	75.4245	0.489194	1.36696	1.56114	0.421965	0.601283	87.8348	5.29918	2.67057	79.8651	0.43463
320	Northern Lights	TRIMBOS Institute	i	5	1.01573	0.388846	1.74825	0	0	0.158126	0	0	0.242796	0.331596	0	0	0	0	0.38176	0.180043	0	1.11961	0.375924	0.235962	0.188043	0	0	0	0	0	0.219881	0.363802	0	0.160002	0.26045	0.27645	0.260369	0.168083	113.629	2.52636	1.35475	0.509929	0.52496	0	126.62	4.2671	3.80862	118.545	0.238038
321	Baba Kush	TRIMBOS Institute	s	1	0.327171	0.179156	1.03212	0	0	0	0	0	0.175259	0.354424	0	0	0	0	0.253166	0.177798	0	1.26877	0.371749	0.32728	0.428304	0	0	0	0	0	0	0	0	0	0	0	0	0.755613	78.7173	0.792926	1.34534	0.57497	0.481015	2.05564	89.618	2.3213	3.32951	83.9672	0.140943
322	AK-47	TRIMBOS Institute	s	1	0.283969	0.295631	0.532897	0	0	0.653507	0	0.466843	0.252791	0.3851	0	0	0	0	0.30343	0.221967	0	2.53447	0.871725	0.464161	0.355181	0	0.403556	0.274444	0	0	0.27847	0.443972	0	0	0	0.197752	0.221929	0	121.022	9.85864	1.91433	0.784484	0.472877	0	143.494	3.17417	6.26763	134.052	0.0894624
323	Enemy of the State	TRIMBOS Institute	i	5	1.11556	0.422292	1.79354	0	0	0.17819	0	0	0.244066	0.364184	0	0	0	0	0.476553	0.229101	0	1.70465	0.611129	0.570784	0.550659	0	0	0.205021	0	0	0.341646	0.454229	0	0.241206	0.582908	0.635152	0.514568	0.458314	137.232	6.21545	2.1613	0.796341	0.560788	0	158.659	4.59439	7.09937	146.966	0.24281
324	Kush	TRIMBOS Institute	i	5	0.412445	0.618667	0.527052	0	0	0.275121	0	0	0.400968	2.21557	0.462111	0.32459	0	0	0.534651	0.17038	0	1.94541	0.53881	0.49521	0.768597	0	0.19801	0.376395	0	0	0.297036	0.289317	0	0.249616	0	0.17038	0.19801	0.673595	148.55	9.0324	1.77962	0.283622	0.685305	0.268883	172.742	5.77118	6.37076	160.6	0.0714663
325	OG Kush	TRIMBOS Institute	s	1	1.70359	0.743336	1.37745	0	0	0	0	0	0.309711	0.545687	0.21674	0.158746	0	0	0.294294	0.164724	0	1.71929	0.658783	0.494209	0.385763	0	0.297385	0.164724	0	0	0.248991	0.31734	0	0	0.397459	0.425561	0.433708	0.168722	110.936	2.89061	1.39008	0.519443	0.429637	0	127.392	5.34956	5.87666	116.166	0.318455
326	LA Kush	TRIMBOS Institute	i	5	0.413617	0.566628	0.528457	0	0	0.256473	0	0.157051	0.785069	2.6114	0.432703	0.290976	0	0	0.516987	0.170925	0	2.67424	0.76685	0.98937	1.33512	0	0.337707	0.560131	0	0.162928	0.301865	0.329854	0	0.289965	0	0.170877	0.202672	0.635813	147.646	6.52615	1.95849	0.317484	0.694557	0.243915	172.874	6.55936	8.92832	157.387	0.0630575
327	Amnesia	TRIMBOS Institute	s	1	0.22153	0.221492	0.604831	0	0	0.69529	0	0.484551	0.169017	0.353098	0	0	0	0	0.274195	0.179298	0	2.35786	0.826267	0.502723	0.420828	0	0.381899	0.307877	0	0	0.362355	0.592293	0	0	0	0.198763	0.210474	0.155877	121.408	10.0259	3.20672	0.873172	0.474724	0	145.509	3.024	6.49651	135.988	0.0732571
328	Santa Maria	TRIMBOS Institute	i	5	0.648917	0.284628	1.70397	0	0	0.155585	0	0	0.231491	0.322585	0	0	0	0	0.360507	0.185028	0	0.960559	0.338561	0.240153	0.240153	0	0	0	0	0	0.212618	0.283436	0	0	0.342494	0.35825	0.314931	0.334629	118.348	8.26016	1.24123	0.772571	0.47236	0	136.612	3.70769	3.81081	129.094	0.175019
329	Amnesia	TRIMBOS Institute	s	1	0.42308	0.59234	0.996149	0	0.16539	0.592247	0	0.861483	0.226996	0.573053	0	0	0	0	0.361568	0.215465	0	3.30821	1.16525	0.654393	0.60251	0	0.430996	0.403039	0	0	0.458904	0.610556	0	0.183558	0	0.195538	0.215482	0.167613	175.885	12.6804	2.66101	1.32488	0.60123	0.17076	206.727	4.79231	8.61151	193.323	0.0882832
330	Amnesia	TRIMBOS Institute	s	1	0.478416	0.842952	1.21125	0	0.250608	1.06317	0.178458	1.56057	0.212638	0.87711	0	0	0	0	0.387301	0.319075	0	3.52158	1.20144	0.567236	0.500265	0	0.425428	0.476639	0	0	0.413613	0.634195	0	0.232405	0	0.20878	0.240288	0.169384	166.758	11.2835	2.7586	1.2419	0.597161	0.179493	198.792	7.06248	8.91033	182.819	0.0677406
[truncated: 39 more columns]

## Sheet: supp_table_2
Phenotype	Cofactors	SNP	Chr	Position	P-value	Gene ID	Name	Type	Min	Max	Length	Intervals	Direction	NCBI Reference	Product
Guaiol	1	chr6:76790611	6	76790611	5.19319e-23	XP_030478495.1	LOC115695577 CDS	CDS	78018321	78020182	1029	4	reverse	GeneID:115695577	alpha-humulene synthase-like
Gamma-eudesmol	1	chr6:76790611	6	76790611	1.38499e-10	XP_030509869.1	LOC115724669 CDS	CDS	78003820	78008984	1718	7	reverse	GeneID:115724669	LOW QUALITY PROTEIN: alpha-humulene synthase-like
Beta-eudesmol	1	chr6:76790611	6	76790611	1.73228e-10	TPS_pseudogene	LOC115724727 gene	gene	77995511	77999711	4201	1	reverse	GeneID:115724727
						XP_030478492.1	LOC115695575 CDS	CDS	77979993	77983535	1659	7	reverse	GeneID:115695575	(-)-germacrene D synthase-like
						XP_030478491.1	LOC115695574 CDS	CDS	77933204	77961791	2247	10	forward	GeneID:115695574	germacrene-A synthase-like
						XP_030478484.1	LOC115695567 CDS	CDS	77744894	77749438	1701	7	forward	GeneID:115695567	(-)-germacrene D synthase-like
						TPSw	LOC115695527 gene	gene	76733017	76738667	5651	1	reverse	GeneID:115695527
						XP_030478817.1	LOC115695866 CDS	CDS	76703023	76710752	1656	7	reverse	GeneID:115695866	alpha-humulene synthase-like isoform X1
						XP_030478816.1	LOC115695865 CDS	CDS	76687960	76692545	1659	7	reverse	GeneID:115695865	alpha-humulene synthase-like
						XP_030478815.1	LOC115695864 CDS	CDS	76671497	76676121	1656	7	reverse	GeneID:115695864	alpha-humulene synthase-like
Phenotype	Cofactors	SNP	Chr	Position	P-value	Gene ID	Name	Type	Min	Max	Length	Intervals	Direction	NCBI Reference	Product
Myrcene	2	chr5:2576403	5	2576403	1.56024e-09	XP_030500449.1	LOC115715915 CDS	CDS	1277939	1284515	1770	7	forward	GeneID:115715915	terpene synthase 10-like isoform X1
		chr5:1348048	5	1348048	2.20127e-07	XP_030500342.1	LOC115715811 CDS	CDS	1309291	1318666	1941	7	forward	GeneID:115715811	terpene synthase 10-like
						XP_030501569.1	LOC115716805 CDS	CDS	1323376	1331221	1893	7	forward	GeneID:115716805	terpene synthase 10-like
						XP_030501570.1	LOC115716806 CDS	CDS	1334845	1341689	1872	7	forward	GeneID:115716806	terpene synthase 10-like isoform X1
						XP_030501298.1	LOC115716604 CDS	CDS	2015280	2023281	1869	7	forward	GeneID:115716604	myrcene synthase, chloroplastic-like
						XP_030501299.1	LOC115716605 CDS	CDS	2028571	2037234	1860	7	forward	GeneID:115716605	myrcene synthase, chloroplastic-like
						XP_030500419.1	LOC115715884 CDS	CDS	2394680	2399648	1845	7	reverse	GeneID:115715884	myrcene synthase, chloroplastic-like isoform X1
						XP_030500630.1	LOC115716066 CDS	CDS	2422351	2424140	858	4	reverse	GeneID:115716066	(-)-limonene synthase, chloroplastic-like
						XP_030500628.1	LOC115716064 CDS	CDS	2425887	2431305	1872	7	reverse	GeneID:115716064	(-)-limonene synthase, chloroplastic isoform X1
						XP_030500626.1	LOC115716063 CDS	CDS	2478767	2492686	1908	7	reverse	GeneID:115716063	myrcene synthase, chloroplastic-like isoform X1
						XP_030501051.1	LOC115716405 CDS	CDS	2517320	2529631	1907	7	reverse	GeneID:115716405	LOW QUALITY PROTEIN: myrcene synthase, chloroplastic-like

## Sheet: supp_table_3
Hazekamp et al. 2016 name	Standard name	Final name
Alpha-2-pinene	alpha-pinene	alpha-pinene
Beta-2-pinene	beta-pinene	beta-pinene
Myrcene	myrcene	myrcene
Alpha-phellandrene	alpha-phellandrene	alpha-phellandrene
Delta-3-carene	delta-3-carene	delta-3-carene
Cis-ocimene	ocimene	ocimene
Gamma-terpinene	gamma-terpinene	gamma-terpinene
Terpinolene		terpinolene*
(-)-Linalool	(-)-linalool	linalool
Beta-phellandrene/R-limonene	limonene	limonene*
Beta-fenchol	fenchol	fenchol
Cis-sabinene hydrate		sabinene hydrate*
Camphor	camphor	camphor
Borneol (+)	(+)-borneol	borneol
Alpha-terpineol	terpineol	terpineol
Cis-bergamotene		unidentified compound 1
Delta-guaiene		delta-guaiene*
Beta-caryophyllene	beta-caryophyllene	caryopyllene
Alpha-humulene	alpha-humulene	alpha-humulene
Gamma-cadinene		gamma-cadinene*
Eudesma		eudesma*
Trans-beta-caryophyllene	(−)-trans-caryophyllene	unidentified compound 2
Alpha-guaiene		alpha-guaiene*
Gamma-selinene		gamma-selinene*
gurjunen/Nerolidol	trans-nerolidol	gurjunen*
Beta-caryophyllene oxide	(−) caryophyllene oxide	caryophyllene oxide
Trans-bergamotene		bergamotene*
Trans-beta-farnesene	farnesene	farnesene
Aromadendrene	(+)-aromadendrene	aromadendrene
Gamma-elemene		gamma-elemene*
Guaiol		guaiol*
Gamma-eudesmol		gamma-eudesmol*
Beta-eudesmol	beta-eudesmol	beta-eudesmol
Alpha-bisabolol	alpha-bisabolol	alpha-bisabolol
Delta-9-tetrahydrocannabinol(THC)	THC	THC
Cannabigerol (CBG)	CBG	CBG
Cannabichromene (CBC)	CBC	CBC
Tetrahydrocannabivarin (THCV)	THVC	THVC
Cannabidiol (CBD)	CBD	CBD
Cannabigerol-monomethylether(CBGM)		CBGM*
		*denotes tentative identifcation
